# Supplementary material for: Comparative Analysis of the Transcriptome of Latent Autoimmune Diabetes in Adult (LADA) Patients from Eastern China
Source: J Diabetes Res. 2019 Dec 14;2019:8616373. doi: 10.1155/2019/8616373 (PMC6948325; doi:10.1155/2019/8616373)
Supplement: Supplementary 1 — Table S1: DEGs between LADA and healthy patients. [file 8616373.f1.xlsx]

## Sheet: Sheet1
gene_id	log2FoldChange	pval
OR7D2	-5.59766	0.0400853
BTBD17	-4.89874	0.0298466
COL12A1	-4.15635	0.0496478
DPY19L2	-3.65013	0.0184157
C17orf97	-3.4979	3.0063e-06
GSTM1	-3.245	0.0223722
LINGO2	-3.12063	0.00152743
BAALC	-3.06291	0.00379762
GRIN3B	-2.90793	0.0043475
CDCP1	-2.87989	0.00130203
HLA-DQA1	-2.73234	0.0320984
TEAD3	-2.69214	0.0239834
HOMER1	-2.52944	0.0113063
PARVA	-2.42226	0.0263029
GAS1	-2.4178	0.0170833
TMEM191B	-2.14157	0.0129281
PTPRM	-2.11536	8.21445e-05
ZFY	-2.07817	0.018012
IRF6	-2.0737	0.0284773
NTRK1	-2.05545	0.0388646
USP9Y	-2.02825	0.0346067
RGPD5	-2.00951	0.0198333
DDX3Y	-1.97314	0.042521
PALLD	-1.81788	0.000745252
DRICH1	-1.77984	0.00163353
VLDLR	-1.77832	0.00202586
PODXL	-1.74255	0.0444597
ERAP2	-1.73135	0.000121465
U2AF1L5	-1.72497	0.0219434
EFNA5	-1.71353	0.0392727
NOMO3	-1.69822	0.00185452
PCDH1	-1.698	0.00731529
RAB38	-1.67879	0.0208629
LIMS4	-1.62994	0.039832
CCND1	-1.60675	0.0345458
EIF1AY	-1.60495	0.0387362
SERPINE2	-1.59885	0.0129484
AP1S3	-1.55773	0.0170264
SUSD2	-1.55066	0.0199008
S100B	-1.54978	0.0403963
AMOT	-1.5161	0.00877052
NINL	-1.51329	0.0357223
NCAM1	-1.49579	0.000401185
NEO1	-1.48937	0.0147234
BNC2	-1.46507	0.0274381
LOC107984841	-1.39818	0.00509254
EPB41L4A	-1.36662	0.00445937
PTPRK	-1.35881	0.0271816
AFAP1	-1.31956	0.0115711
DNAH10	-1.31366	0.0291532
FBLN2	-1.30411	0.041145
ZNF501	-1.29505	0.028576
DLG5	-1.29068	0.00837125
JMJD1C	-1.25693	0.0448915
TENM1	-1.24613	0.014338
TCF4	-1.2157	0.0406962
LOC107987158	-1.19143	0.00289722
LOC107985544	-1.16131	0.0306624
BOD1L1	-1.11882	0.0128462
LGALS9C	-1.10991	0.0209392
FEZ1	-1.0947	0.0394511
HK2	-1.09313	0.019403
AGAP1	-1.09197	0.0276257
PRF1	-1.08552	0.0167994
ITPR2	-1.07507	0.00521466
IGF2R	-1.06985	0.0059414
LY75	-1.06489	0.00902012
RAPGEF2	-1.06443	0.00629525
TIAM2	-1.06166	0.0289655
MYRF	-1.04694	0.0451088
TGFBR3	-1.04376	0.0346728
TCAF1	-1.03612	0.0311317
SPTY2D1	-1.03584	0.0193718
CHD7	-1.02391	0.0335282
ZBTB16	-1.02213	0.0323268
UBR1	-1.01764	0.0489052
UTRN	-1.01247	0.039155
DICER1	-1.00975	0.0323833
CMTM5	1.01083	0.00678972
PID1	1.01161	0.00971628
IGF2BP2	1.0118	0.00500531
HMBS	1.01268	0.00763099
ASGR1	1.01282	0.00715648
XK	1.02009	0.0099246
MMP8	1.02041	0.0164532
FAM210B	1.02345	0.00306493
METTL21B	1.02689	0.0326121
A1BG	1.03128	0.0435156
SLC38A5	1.03286	0.0293781
KRT73	1.03687	0.0499286
TRIM58	1.04232	0.0353938
HES6	1.04736	0.047708
SLC25A39	1.04862	0.00517328
LOC107984832	1.05381	0.0456476
CLDN5	1.05445	0.0412994
NT5DC2	1.06917	0.0382749
GSTM3	1.07201	0.0172326
DPM2	1.0742	0.00309604
SH3RF3	1.07575	0.00993075
RPP25	1.08235	0.0111245
LY6G6F	1.08274	0.00512165
PTCRA	1.0863	0.00500511
LOC107985770	1.0951	0.00331391
TCEA3	1.09809	0.0450704
C9orf78	1.10407	0.00613089
KEL	1.11543	0.00630061
KANK2	1.11558	0.0164315
IL23A	1.11575	0.0214428
EMID1	1.12861	0.0202375
TSPAN4	1.13912	0.00308236
CTSE	1.14284	0.0494658
SUPT3H	1.14584	0.0216382
KCNH3	1.16337	0.0425459
AQP10	1.16639	0.0098662
TJP3	1.16766	0.0141336
PPBP	1.17146	0.009199
BLVRB	1.1721	0.00081279
TMEM38A	1.17267	0.0239357
FAM69B	1.17301	0.0170752
SPR	1.1792	0.0284952
FAM167B	1.18199	0.0490453
PF4	1.19257	0.000931485
SAMD14	1.21517	0.00382795
LOC105376752	1.21618	0.0212904
CHPT1	1.22112	0.00315479
TREML1	1.22162	0.000594997
LGALS3	1.22559	0.000508643
EGFL7	1.22941	0.00573072
CPNE7	1.23165	0.0469302
FAXDC2	1.23389	0.000642051
FKBP1B	1.24027	0.00622218
SHROOM1	1.24662	0.00201574
SMIM5	1.24753	0.0052276
YBX3	1.25206	0.00764291
CAMP	1.25351	0.0118093
OLFM1	1.25468	0.00373857
NR2F6	1.25646	0.00901932
KLKB1	1.26222	0.0254627
GPR146	1.26831	0.00244545
NMNAT3	1.27223	0.0137802
C20orf27	1.27609	0.00519297
ACP5	1.27715	0.000314626
LOC107984138	1.28068	0.00851591
BBOF1	1.28322	0.00168185
PNMA3	1.28402	0.0377908
PTPRN	1.28756	0.0486796
EMP1	1.29647	0.0233643
UPK3A	1.30068	0.0111138
ANKRD9	1.31006	0.0145131
ICAM4	1.31353	0.015519
CXCL8	1.32971	0.00628405
CCNE1	1.33892	0.03078
GLRX5	1.33915	0.000933484
ARG2	1.34348	0.0294595
ZNF385C	1.34534	0.028984
GMPR	1.34887	0.01048
KLHDC8A	1.3514	0.0185811
TTC25	1.35211	0.0074828
SLC4A1	1.35528	0.0162779
TSHZ2	1.3601	0.00123061
SLC14A1	1.36311	0.00955858
ACHE	1.3659	0.0467244
DNLZ	1.37266	0.0260519
NRP1	1.37526	0.0290305
ACVRL1	1.3928	0.0101694
HBA1	1.39505	0.00624095
RUNDC3A	1.40349	0.000246742
DPCD	1.4068	0.00825512
PVALB	1.41166	0.0249054
TRNP1	1.41518	0.0420108
ENHO	1.43775	0.0084608
AHSP	1.44674	0.00111895
PF4V1	1.45264	0.000442005
TPPP3	1.45285	0.00555053
MYL4	1.45627	0.00244493
OLR1	1.46195	0.00928041
OSBP2	1.46748	0.00262211
EPB42	1.48043	0.00616402
HBD	1.48275	0.00245587
HKDC1	1.48495	0.00051575
PI16	1.4855	0.000192616
TMOD1	1.49336	0.000795438
PCSK1N	1.51312	0.00717397
DES	1.51503	0.0188414
FAM86C1	1.53342	0.00204125
MFSD2B	1.5349	0.00498199
SLC28A3	1.5447	0.047365
PRKCDBP	1.54707	0.0287003
MUC8	1.55296	0.00876366
ZP3	1.55856	0.00271866
FZD6	1.56352	0.0196737
SMOX	1.56732	0.00323405
RHD	1.57919	0.000945921
CACNA1I	1.58042	0.00027115
PADI6	1.58611	0.0366456
NKPD1	1.59474	0.0487098
SMIM1	1.61613	0.0163815
HBQ1	1.62539	7.11721e-06
RGMB	1.63212	0.0266586
RNASE1	1.63526	0.0122645
KLC3	1.64054	2.27114e-05
SPATA6L	1.65105	0.0463698
MB21D2	1.65556	0.00358992
RNASE3	1.66265	0.0172786
CLDN7	1.67101	0.00577159
SLC5A5	1.69335	0.0298046
ACKR1	1.71403	0.0251156
TSTA3	1.71805	0.001344
KANK1	1.71945	0.000110704
CCL2	1.72378	0.0366338
LOC105369155	1.72566	0.0475375
ST6GALNAC4	1.72977	1.34329e-06
FHIT	1.73012	0.00014243
SEMA3G	1.75506	0.023368
SLC9A5	1.77721	0.013119
RETN	1.81553	0.00189186
TUBB2A	1.82111	0.000131819
L1TD1	1.82433	0.0249741
IFI27	1.83352	0.0253548
NKX3-1	1.83679	0.0449998
DACT1	1.83979	0.0266316
SORCS3	1.84397	0.0143702
TUBB6	1.88108	2.97632e-06
TSPO2	1.90155	0.0142681
TMEM63C	1.9016	0.00132874
THEM5	1.90436	0.00592899
ADAMTS2	1.92395	0.0318738
PLEK2	1.93027	4.17779e-06
GYPA	2.01486	0.0400495
SELENBP1	2.04114	0.0041378
KLF1	2.06258	0.000110711
C16orf95	2.06995	0.0205089
EDA	2.09148	0.022951
KNDC1	2.10136	0.0383293
MARCO	2.10796	4.50445e-07
PCDH12	2.17448	0.000242697
RGPD2	2.19399	0.0426127
SLC4A11	2.19456	0.0190378
KRT1	2.28933	0.00107372
TSPAN7	2.29072	0.0265291
HEPACAM2	2.31552	0.00770817
RAP1GAP	2.32251	0.0275846
MAPK12	2.3619	0.0324669
CA1	2.3961	0.00469439
BCAM	2.52868	0.000859837
CAPN11	2.7153	0.0232416
ALAS2	2.7218	0.00288826
HSD11B1	2.75682	0.0268395
HRASLS	2.79426	0.000101671
CDS1	2.82066	0.00893003
SPDYC	2.85326	0.00447674
PRSS41	2.87275	0.0117565
ARC	2.89085	0.0158963
TMC5	3.00125	0.00178572
CPT1C	3.04935	0.00418455
KCNK17	3.217	0.0063741
SMIM11A	3.2666	0.0435495
SGIP1	3.27422	7.2336e-05
LDHC	3.40257	0.0498016
KRT18	3.52327	0.00247443
OVOS2	3.58392	0.00647171
NPC1L1	3.70871	0.0496573
KLHL30	3.83085	0.00314587
FAM132B	3.84741	0.00677848
ANXA8	4.31973	0.00157738
LOC107984159	4.35681	0.0463286
APOE	5.11167	0.0312756
CDH4	5.2358	0.00533562
PGF	5.39753	0.00554394
CCL23	5.55772	0.000171821
CPLX2	Inf	0.0289551
FAM221B	Inf	0.00485744
LOC105370295	Inf	0.000439425
SLC22A13	Inf	0.0244817
SLC6A3	Inf	0.0242414
TMEM232	Inf	0.03691
SNTG2	#NAME?	0.0158914
