# Supplementary material for: Comparative Analysis of the Transcriptome of Latent Autoimmune Diabetes in Adult (LADA) Patients from Eastern China
Source: J Diabetes Res. 2019 Dec 14;2019:8616373. doi: 10.1155/2019/8616373 (PMC6948325; doi:10.1155/2019/8616373)
Supplement: Supplementary 2 — Table S2: top GO term analysis of DEGs between LADA and healthy patients. [file 8616373.f2.xlsx]

## Sheet: Sheet1
id	term	category	pval	Enrichment_score	Gene
GO:0090023	positive regulation of neutrophil chemotaxis	biological_process	3.47113e-06	11.7265	PF4V1; PF4; PPBP; CXCL8; IL23A
GO:0070098	chemokine-mediated signaling pathway	biological_process	5.91606e-06	7.13785	PF4V1; PF4; ACKR1; PPBP; CCL23; CXCL8; CCL2
GO:0002021	response to dietary excess	biological_process	7.83036e-06	21.1076	PCSK1N; APOE; SGIP1
GO:0002690	positive regulation of leukocyte chemotaxis	biological_process	1.52334e-05	12.2363	PF4V1; PF4; PPBP; CXCL8
GO:0031643	positive regulation of myelination	biological_process	2.57774e-05	16.2366	S100B; MYRF; DICER1
GO:0090501	RNA phosphodiester bond hydrolysis	biological_process	3.56858e-05	15.0769	RNASE1; RNASE3; DICER1
GO:0015671	oxygen transport	biological_process	4.81199e-05	14.0718	HBD; HBA1; HBQ1
GO:0048168	regulation of neuronal synaptic plasticity	biological_process	6.34447e-05	13.1923	S100B; ARC; APOE
GO:0006833	water transport	biological_process	8.20418e-05	12.4163	UPK3A; SLC14A1; AQP10
GO:0007010	cytoskeleton organization	biological_process	9.95673e-05	3.95768	PADI6; ARC; APOE; TUBB2A; EPB42; TUBB6; CCL2; PALLD; DES
GO:0005833	hemoglobin complex	cellular_component	4.07561e-07	23.4529	HBD; AHSP; HBA1; HBQ1
GO:0043025	neuronal cell body	cellular_component	1.6975e-06	3.54926	S100B; OLFM1; ARC; KNDC1; SLC6A3; ACVRL1; PTPRK; PTPRN; GRIN3B; APOE; PVALB; FEZ1; NTRK1; NRP1; GLRX5; RAPGEF2; CPLX2
GO:1903561	extracellular vesicle	cellular_component	9.5402e-06	7.96514	APOE; COL12A1; TUBB2A; SERPINE2; FBLN2; SLC5A5
GO:0005886	plasma membrane	cellular_component	7.12011e-05	1.43828	CPNE7; SUSD2; SLC4A1; SLC9A5; FZD6; OLR1; KLKB1; CACNA1I; KEL; BTBD17; EMP1; ARC; PRSS41; NPC1L1; GAS1; FHIT; SLC14A1; GPR146; TCAF1; SLC6A3; ACVRL1; IGF2R; PCDH1; PODXL; TSPAN4; AQP10; PTPRK; PTPRM; PTPRN; CDH4; DLG5; EFNA5; KANK1; APOE; ZP3; KCNK17; ACKR1; CLDN5; CLDN7; ACHE; ERAP2; BLVRB; VLDLR; ASGR1; EPB42; RAB38; BCAM; EDA; RGMB; SLC22A13; HOMER1; TENM1; AMOT; FEZ1; NTRK1; CDCP1; NRP1; MARC…
GO:0031012	extracellular matrix	cellular_component	9.48995e-05	3.43976	KRT1; APOE; ZP3; COL12A1; SERPINE2; A1BG; BCAM; FBLN2; NCAM1; LGALS3; EGFL7
GO:0005615	extracellular space	cellular_component	0.000110378	1.85698	S100B; TGFBR3; OLFM1; SELENBP1; OVOS2; PCSK1N; KLKB1; PF4V1; KRT1; PI16; PF4; PGF; CMTM5; PODXL; RETN; APOE; ZP3; COL12A1; SERPINE2; MMP8; ACHE; A1BG; LINGO2; CAMP; PPBP; NRP1; CCL23; CXCL8; LGALS3; FAM132B; ADAMTS2; EGFL7; SEMA3G; CCL2; HBA1; RNASE3
GO:0016327	apicolateral plasma membrane	cellular_component	0.000130652	11.1093	FZD6; CLDN5; CLDN7
GO:0030863	cortical cytoskeleton	cellular_component	0.00019728	10.0513	SLC4A1; TMOD1; EPB42
GO:0005923	bicellular tight junction	cellular_component	0.000337609	4.07034	CCND1; CLDN5; CLDN7; AMOT; YBX3; TJP3; RAPGEF2
GO:0005856	cytoskeleton	cellular_component	0.000353254	2.60588	IGF2BP2; KRT1; TMOD1; PLEK2; KANK1; KANK2; EPB42; EDA; TENM1; SNTG2; PARVA; EPB41L4A; UTRN; TTC25
GO:0045236	CXCR chemokine receptor binding	molecular_function	1.49221e-06	18.7623	PF4V1; PF4; PPBP; CXCL8
GO:0008009	chemokine activity	molecular_function	4.1856e-06	8.98197	PF4V1; PF4; PPBP; CCL23; CXCL8; CCL2
GO:0005344	oxygen carrier activity	molecular_function	3.56858e-05	15.0769	HBD; HBA1; HBQ1
GO:0008201	heparin binding	molecular_function	8.9666e-05	4.00778	TGFBR3; PF4V1; PF4; PGF; APOE; SERPINE2; TENM1; NRP1; CCL23
GO:0043236	laminin binding	molecular_function	0.00028543	9.17723	ACHE; BCAM; LGALS3
GO:0030246	carbohydrate binding	molecular_function	0.000953523	3.19813	OLR1; KRT1; LY75; ZP3; LGALS9C; ASGR1; LGALS3; NOMO3
GO:0005452	inorganic anion exchanger activity	molecular_function	0.0011799	6.39625	SLC4A1; SLC4A11; SLC22A13
GO:0015026	coreceptor activity	molecular_function	0.0016428	5.86323	TGFBR3; RGMB; NRP1
GO:0001540	amyloid-beta binding	molecular_function	0.00173597	4.61369	FZD6; APOE; ACHE; MARCO
GO:0019825	oxygen binding	molecular_function	0.00292071	5.02563	HBD; HBA1; HBQ1
