# Supplementary material for: Comparative Analysis of the Transcriptome of Latent Autoimmune Diabetes in Adult (LADA) Patients from Eastern China
Source: J Diabetes Res. 2019 Dec 14;2019:8616373. doi: 10.1155/2019/8616373 (PMC6948325; doi:10.1155/2019/8616373)
Supplement: Supplementary 3 — Table S3: KEGG pathway classification analysis of DEGs between LADA and healthy patients. [file 8616373.f3.xlsx]

## Sheet: Sheet1
Classification_level2	Classification_level1	gene_number	percentage	Genes
Cell growth and death	Cellular Processes	8	7.41	CCND1; CCNE1; CXCL8; ITPR2; MAPK12; NTRK1; PRF1; SPDYC
Cellular community - eukaryotes	Cellular Processes	15	13.89	AMOT; CCND1; CLDN5; CLDN7; FZD6; ITPR2; MAPK12; PARVA; PGF; PTPRM; RAPGEF2; TJP3; TUBB2A; TUBB6; YBX3
Transport and catabolism	Cellular Processes	10	9.26	ACP5; AGAP1; AP1S3; CTSE; HLA-DQA1; IGF2R; MARCO; OLR1; TUBB2A; TUBB6
Signal transduction	Environmental Information Processing	25	23.15	AMOT; CACNA1I; CCL2; CCND1; CCNE1; CDS1; CPT1C; CXCL8; EFNA5; FZD6; GAS1; GRIN3B; HK2; HKDC1; HOMER1; IL23A; ITPR2; MAPK12; MYL4; NTRK1; PGF; PTCRA; RAP1GAP; RAPGEF2; TEAD3
Signaling molecules and interaction	Environmental Information Processing	16	14.81	CCL2; CCL23; CDH4; CLDN5; CLDN7; CXCL8; EDA; GRIN3B; HLA-DQA1; IL23A; NCAM1; NEO1; PF4; PF4V1; PPBP; PTPRM
Transcription	Genetic Information Processing	1	0.93	U2AF1L5
Translation	Genetic Information Processing	4	3.7	EIF1AY; RGPD2; RGPD5; RPP25
Cancers	Human Diseases	24	22.22	CCND1; CCNE1; CHPT1; CXCL8; DICER1; FHIT; FZD6; GSTM1; GSTM3; HK2; HKDC1; HSD11B1; IL23A; ITPR2; JMJD1C; MAPK12; NKX3-1; NTRK1; PGF; PTCRA; SUPT3H; TSPAN7; UPK3A; ZBTB16
Cardiovascular diseases	Human Diseases	8	7.41	CCL2; CCND1; DES; GSTM1; GSTM3; HLA-DQA1; MAPK12; PRF1
Drug resistance	Human Diseases	4	3.7	CCND1; GSTM1; GSTM3; MAPK12
Endocrine and metabolic diseases	Human Diseases	13	12.04	CACNA1I; CCL2; CCND1; CCNE1; CXCL8; FZD6; HK2; HKDC1; HLA-DQA1; ITPR2; MAPK12; PRF1; PTPRN
Immune diseases	Human Diseases	7	6.48	ACP5; CCL2; CXCL8; HLA-DQA1; IL23A; PRF1; RNASE3
Infectious diseases	Human Diseases	23	21.3	ACKR1; ARG2; CAMP; CCL2; CCND1; CCNE1; CLDN5; CLDN7; CXCL8; FZD6; GYPA; HBA1; HES6; HLA-DQA1; IL23A; ITPR2; KLC3; KRT18; MAPK12; NRP1; TUBB2A; TUBB6; U2AF1L5
Neurodegenerative diseases	Human Diseases	6	5.56	APOE; DNAH10; ITPR2; MAPK12; NCAM1; SLC6A3
Substance dependence	Human Diseases	3	2.78	ARC; GRIN3B; SLC6A3
Amino acid metabolism	Metabolism	4	3.7	ALAS2; ARG2; LDHC; SMOX
Biosynthesis of other secondary metabolites	Metabolism	2	1.85	HK2; HKDC1
Carbohydrate metabolism	Metabolism	4	3.7	HK2; HKDC1; LDHC; TSTA3
Energy metabolism	Metabolism	1	0.93	CA1
Glycan biosynthesis and metabolism	Metabolism	2	1.85	DPM2; ST6GALNAC4
Lipid metabolism	Metabolism	6	5.56	ACHE; CDS1; CHPT1; CPT1C; HSD11B1; THEM5
Metabolism of cofactors and vitamins	Metabolism	6	5.56	ACP5; ALAS2; BLVRB; HMBS; NMNAT3; SPR
Metabolism of other amino acids	Metabolism	4	3.7	CHPT1; GSTM1; GSTM3; SMOX
Nucleotide metabolism	Metabolism	2	1.85	FHIT; GMPR
Xenobiotics biodegradation and metabolism	Metabolism	3	2.78	GSTM1; GSTM3; HSD11B1
Circulatory system	Organismal Systems	3	2.78	ITPR2; MAPK12; MYL4
Development	Organismal Systems	5	4.63	ACP5; EFNA5; MAPK12; NRP1; SEMA3G
Digestive system	Organismal Systems	7	6.48	APOE; CAMP; COL12A1; HK2; HKDC1; ITPR2; NPC1L1
Endocrine system	Organismal Systems	14	12.96	ASGR1; CACNA1I; CCND1; CPT1C; FZD6; HK2; HKDC1; ITPR2; KRT18; LDHC; MAPK12; OLR1; SLC5A5; SPDYC
Environmental adaptation	Organismal Systems	3	2.78	CACNA1I; CPT1C; MAPK12
Excretory system	Organismal Systems	1	0.93	SLC4A1
Immune system	Organismal Systems	16	14.81	CAMP; CCL2; CCL23; CLDN5; CLDN7; CXCL8; GYPA; HLA-DQA1; IL23A; ITPR2; KLKB1; MAPK12; PF4; PF4V1; PPBP; PRF1
Nervous system	Organismal Systems	9	8.33	ACHE; CPLX2; GRIN3B; HOMER1; ITPR2; MAPK12; NTRK1; SLC38A5; SLC6A3
Sensory system	Organismal Systems	4	3.7	ITPR2; MAPK12; NTRK1; OR7D2
