# Supplementary material for: Comparative Analysis of the Transcriptome of Latent Autoimmune Diabetes in Adult (LADA) Patients from Eastern China
Source: J Diabetes Res. 2019 Dec 14;2019:8616373. doi: 10.1155/2019/8616373 (PMC6948325; doi:10.1155/2019/8616373)
Supplement: Supplementary 4 — Table S4: top KEGG pathway of DEGs between LADA and healthy patients. [file 8616373.f4.xlsx]

## Sheet: Sheet1
id	term	pval	Enrichment_score	Gene
hsa05144	Malaria	7.15527e-05	6.97468	ACKR1; CCL2; CXCL8; GYPA; HBA1
hsa04514	Cell adhesion molecules (CAMs)	0.00112265	3.34589	CDH4; CLDN5; CLDN7; HLA-DQA1; NCAM1; NEO1; PTPRM
hsa00051	Fructose and mannose metabolism	0.00127884	6.2138	HK2; HKDC1; TSTA3
hsa05323	Rheumatoid arthritis	0.00196329	3.79733	ACP5; CCL2; CXCL8; HLA-DQA1; IL23A
hsa05219	Bladder cancer	0.00289372	5.00136	CCND1; CXCL8; UPK3A
hsa00860	Porphyrin and chlorophyll metabolism	0.00316278	4.88228	ALAS2; BLVRB; HMBS
hsa04530	Tight junction	0.00334355	2.81449	AMOT; CCND1; CLDN5; CLDN7; RAPGEF2; TJP3; YBX3
hsa04940	Type I diabetes mellitus	0.00344842	4.76873	HLA-DQA1; PRF1; PTPRN
hsa00520	Amino sugar and nucleotide sugar metabolism	0.00514209	4.27199	HK2; HKDC1; TSTA3
hsa05202	Transcriptional misregulation in cancers	0.00575104	2.57238	CXCL8; JMJD1C; NTRK1; PTCRA; SUPT3H; TSPAN7; ZBTB16
hsa05130	Pathogenic Escherichia coli infection	0.00833747	3.72828	KRT18; TUBB2A; TUBB6
hsa05416	Viral myocarditis	0.0106428	3.47552	CCND1; HLA-DQA1; PRF1
hsa04933	AGE-RAGE signaling pathway in diabetic complications	0.014735	2.76169	CCL2; CCND1; CXCL8; MAPK12
hsa05131	Shigellosis	0.0148142	3.1547	CXCL8; MAPK12; U2AF1L5
hsa05230	Central carbon metabolism in cancer	0.0148142	3.1547	HK2; HKDC1; NTRK1
hsa05031	Amphetamine addiction	0.0172382	3.01552	ARC; GRIN3B; SLC6A3
hsa00010	Glycolysis / Gluconeogenesis	0.0180981	2.97182	HK2; HKDC1; LDHC
hsa04060	Cytokine-cytokine receptor interaction	0.0181965	2.00298	CCL2; CCL23; CXCL8; EDA; IL23A; PF4; PF4V1; PPBP
hsa04062	Chemokine signaling pathway	0.01847	2.21682	CCL2; CCL23; CXCL8; PF4; PF4V1; PPBP
hsa00980	Metabolism of xenobiotics by cytochrome P450	0.0218026	2.80898	GSTM1; GSTM3; HSD11B1
