# Supplementary material for: Comparative Analysis of the Transcriptome of Latent Autoimmune Diabetes in Adult (LADA) Patients from Eastern China
Source: J Diabetes Res. 2019 Dec 14;2019:8616373. doi: 10.1155/2019/8616373 (PMC6948325; doi:10.1155/2019/8616373)
Supplement: Supplementary 5 — Table S5: DEGs between TID and healthy patients. [file 8616373.f5.xlsx]

## Sheet: Sheet1
Gene symbol	P.Value	logFC
AA504249	1.7978e-07	-0.612263
AA532718	7.86654e-07	-0.771881
BF000597	1.69625e-06	-0.832659
MALAT1	3.06232e-06	0.930627
MIR29C	5.71985e-06	0.440598
TACC1	7.59293e-06	-0.499918
EGR1	1.23428e-05	1.61344
TLR4	1.3278e-05	0.630983
AI492388	1.40834e-05	-0.707401
TRA2A	1.5031e-05	-0.509803
NRBF2	1.86833e-05	0.597285
AL566294	2.0947e-05	-0.639162
AI801666	2.40366e-05	-0.694816
AI797788	2.59524e-05	-0.857323
IL6R	3.07731e-05	0.389991
FUBP3	3.12271e-05	-0.609787
SNORD104	3.31115e-05	0.491253
SNRPA1	3.89184e-05	-0.519641
MAFB	4.87695e-05	0.91905
N39230	5.84389e-05	0.8398
CCNY	5.90111e-05	-0.288879
PPP2R5E	6.28738e-05	-0.232312
BE856980	7.36411e-05	-0.456372
UBR1	7.57201e-05	0.313113
RPS10-NUDT3	8.88692e-05	-0.436049
FAM13A-AS1	9.03215e-05	-0.411129
AA767714	9.03289e-05	0.381159
RNF145	9.40572e-05	0.374909
AA921841	0.000103574	-0.4102
OFD1	0.000114262	-0.432087
ZNF350	0.000122907	-0.406107
IGLJ3	0.000126195	0.729192
PHLDA1	0.000126516	0.769211
SH3BP5L	0.000133361	0.524364
SASH1	0.000137305	0.587679
STK17B	0.000146004	0.408633
AL042660	0.000155561	-0.446136
AI435046	0.000161668	0.76631
PDLIM2	0.000163005	-1.06594
AI167682	0.000164068	0.846571
TRIB1	0.000164307	0.936574
AI821399	0.000175535	-0.604821
AF257098	0.00017951	1.1852
MBNL2	0.000191754	-0.438217
BF513404	0.000194061	-0.533633
SPIDR	0.000196657	0.531022
BE857355	0.000219148	-0.772377
IGK	0.000220026	0.424437
SLC25A36	0.000222388	-0.410732
CISH	0.000230427	0.617486
BE672557	0.000231514	-1.18593
AKAP10	0.000239366	-0.545617
AI092824	0.0002457	-0.425521
AA057437	0.00024725	-0.530554
AA001543	0.000248947	-0.628618
METTL9	0.000254217	-0.321315
PELI1	0.000255131	-0.565059
LSG1	0.000255203	0.428568
AA528070	0.000257309	-0.41888
FUS	0.000259393	-0.488059
AK026036	0.000261808	-0.727953
CALCOCO2	0.000273112	-0.251543
R44974	0.000279415	-0.790523
PTPRS	0.000285583	-0.420659
DGAT2	0.000292674	0.59601
RSL24D1	0.000298284	-0.339311
PCSK7	0.000298309	-0.436466
AA651631	0.000317548	-0.583767
ZNF180	0.000330187	1.11771
DST	0.000339727	-1.16572
AI360167	0.000353616	-0.347524
BG222258	0.000360459	-0.653232
AA811257	0.000372338	-0.704423
MGEA5	0.000376118	-0.301509
AI478850	0.000378267	-0.440479
LOC285178	0.000383576	0.641481
PLEKHH2	0.000393086	0.594432
AL036662	0.000398973	-0.347545
PROK2	0.00040575	1.07848
ARID3A	0.000416816	0.329076
AW003230	0.000425341	-0.548447
TNFRSF10C	0.000428054	1.01256
ADH4	0.000443615	0.613663
GIMAP6	0.000466038	0.414124
AI076370	0.000470166	-1.20813
MXD1	0.000496217	0.667972
AA453791	0.000498653	-0.408391
RNF149	0.00052229	0.488575
H2AFY	0.000529447	-0.307161
USP24	0.000541367	-0.481227
ACTR2	0.000544408	-0.518355
HS6ST3	0.000547569	0.525086
AI598222	0.000561516	-0.326543
GIMAP7	0.000578995	0.653187
RNF103-CHMP3	0.000592079	-0.20683
AA404996	0.000600428	-0.406644
KRTAP3-1	0.000622747	-0.363279
BF431867	0.000628282	-0.497922
TMCC3	0.000629054	0.438243
LPP	0.000648065	-0.225635
POLK	0.000653697	-0.365234
LEMD1	0.000666622	0.91196
LINC01272	0.000668074	0.851932
AKTIP	0.00067162	0.322367
LOC646484	0.000702862	1.07677
UXS1	0.000715543	0.359046
BE222450	0.000717132	-0.388957
AI571719	0.000717591	-0.396317
GGTA1P	0.000724708	-0.54292
LOC100996809	0.000738163	-2.35414
RASSF6	0.000738346	0.415124
BG392414	0.000744145	-0.543839
R43301	0.000745811	0.82332
AA680403	0.000792979	0.895753
PPP1R3B	0.000795581	0.588645
ZNF615	0.000797814	0.388953
AF339768	0.000820079	-0.512722
WDR11	0.00082671	-0.486119
MIR6883	0.00082711	-0.604354
AU145144	0.000842172	-0.365465
BF448300	0.000847509	0.562054
AI791138	0.000886426	-0.362909
AL040360	0.000900086	-0.317845
AU145361	0.000904743	-0.663039
HK2	0.000913251	0.878953
TAGAP	0.000933427	0.349532
VPS13C	0.000950185	-0.316099
AI697714	0.000959179	-1.011
BF513674	0.000965731	0.55498
MZB1	0.000969406	0.745489
AU147903	0.000969821	-0.702802
ZNF225	0.0009744	0.420655
ASPRV1	0.00102531	0.271427
AW205919	0.00102576	-1.11206
AHCTF1	0.00103294	0.300345
ANKRD10-IT1	0.00104493	-0.426335
CLNS1A	0.00107982	-0.415016
HNF4A	0.00110383	0.40155
AA565051	0.00111327	-0.491648
SH2D3C	0.00112971	0.402462
JMJD4	0.00114305	0.46076
T97717	0.00115155	-0.49571
AF116695	0.00118292	0.586421
BF224204	0.00118934	-0.450867
BF507638	0.00119355	-0.384392
AW451785	0.00120013	-0.455991
WNK1	0.00121185	-0.581742
SHANK3	0.00121757	-0.643856
AA868729	0.00122255	-0.446781
ELMOD2	0.00123154	0.287487
AA682674	0.0012614	-0.421373
SNIP1	0.00126529	0.376674
BF433103	0.00128054	-0.415151
RGL4	0.0012877	0.507809
SOCS3	0.0012992	1.0909
AI280328	0.00131478	-0.486492
C8orf34	0.0013336	1.12704
YARS	0.00134476	-0.401932
CCDC102B	0.00134578	-1.05761
AI338705	0.00134802	-0.477333
DEF8	0.00136181	0.367856
LMO4	0.0013951	-0.327007
ATP5E	0.00139808	-0.55873
FBXO38	0.00141263	0.286341
HOTS	0.00142777	-0.597188
AW952547	0.00142967	-0.316482
AW026963	0.00143543	-0.968769
KISS1R	0.00147696	0.647202
ACRBP	0.0014964	-0.579103
LRRC58	0.00150714	-0.21736
WDR89	0.00150732	0.225209
AI948581	0.00151327	0.590157
ZNF830	0.00151505	0.23632
RC3H1	0.00152351	0.209321
PIK3C2A	0.00152509	-0.211948
AI906424	0.00155936	-0.415849
EIF4E2	0.00156906	0.203571
AL110230	0.00157883	-0.318983
AA846804	0.00158052	-1.08011
BE644953	0.00159189	-0.465383
C2orf40	0.00159568	0.874918
LOC102725426	0.00160692	0.696494
IGLC1	0.00160873	0.469034
LRP10	0.00163261	0.292173
PHAX	0.00163752	0.339568
SCYL3	0.0016435	0.387435
SSPN	0.00164542	0.811515
43344	0.00164637	0.460125
HS3ST3B1	0.00165171	0.572953
EGLN1	0.00168039	0.314486
ST3GAL1	0.00169159	0.233418
AA026388	0.00178335	-0.422931
MIR6741	0.00185261	0.316469
BF432461	0.00187305	0.874512
BE503070	0.00188503	-0.379353
RORC	0.00189093	1.0391
TSSK2	0.00190203	1.03769
AI084489	0.00193988	-0.356348
STON2	0.00196067	-0.391329
BF513346	0.00196504	-0.442852
MOB3A	0.00198163	0.33976
CLCN5	0.00204181	-0.221214
AW993690	0.00207022	0.869028
AK022474	0.00210938	-0.714997
EMC3	0.00217007	-0.261755
FAAP100	0.00217138	0.675322
BNC2	0.00217454	-0.317774
BTLA	0.00222071	0.387756
AL137331	0.00222854	0.715159
ATXN7L1	0.00224853	-0.29746
MIR21	0.0022594	0.53895
TET2	0.00226457	0.264853
ZNF10	0.00226484	0.317159
SLC12A9	0.00227747	0.406319
KIF3B	0.0022959	0.230539
ABHD17B	0.00231036	0.248047
PRMT6	0.00233741	0.466978
AI018256	0.00241334	-0.338286
AA211369	0.0024214	-0.438195
FBXO5	0.00242273	0.482864
CUL4A	0.00245523	-0.41979
AI435163	0.00247384	-0.687196
CTSS	0.00250477	-0.29752
CARD6	0.0025968	0.40908
SAMD9	0.00261755	0.450564
SUN3	0.0026351	-0.735879
LOC440570	0.00268319	-0.587445
ANKRD9	0.00268765	-0.671123
N30158	0.002715	-0.412924
AI652000	0.00272059	-0.417885
LOC100293211	0.00272994	0.817576
BF056209	0.00273706	-0.384312
CMTM2	0.00276787	0.990107
CHST9	0.00280032	-0.727609
BG026159	0.00280923	-0.287642
CKAP2	0.00281276	0.437777
NAPA-AS1	0.00281963	0.335137
DCAF8	0.00283342	-0.21794
LRRN1	0.00284936	1.09635
RAB3GAP2	0.00285325	-0.404463
AI475124	0.0028533	-0.850189
AI681868	0.0028664	0.991199
T81422	0.00292852	-0.898053
SPOCD1	0.00298642	-0.634076
CASR	0.00301318	-0.447805
APIP	0.00301555	-0.847019
NR3C1	0.00302611	-0.398671
PSMB7	0.0030407	-0.820531
LUC7L2	0.00305098	-0.227541
AW117181	0.00312921	1.07293
AA482221	0.00314452	-0.655755
LOC100134822	0.00314915	0.509753
FAM221B	0.00315566	-0.885704
DDX49	0.00318931	0.786572
AI769647	0.00322367	-0.936445
IL7R	0.00322428	0.34549
SLC30A7	0.00326264	-0.271711
WDR36	0.00328027	0.236535
RAPGEF6	0.00328834	0.307821
AI653426	0.00328943	-0.563135
BMS1P6	0.0032941	-0.27117
CSDE1	0.00329833	-0.261749
GUCY1A3	0.00334773	-0.516997
AI653318	0.00336522	-0.363886
ELOVL7	0.00341658	-0.876497
AA601031	0.00343289	1.01766
PSMD6-AS2	0.00344098	-0.279835
GNAS-AS1	0.00347256	-0.985057
LINC01128	0.00348066	0.273941
PDE7A	0.00349762	0.263936
CELF4	0.00350292	0.322271
AU156181	0.00352451	-0.77534
AW301766	0.00353393	1.156
KCTD5	0.00355491	0.312405
RUFY3	0.00357764	-0.256162
LNX2	0.00358708	0.511432
CLMN	0.00362439	-0.514505
LOC101928291	0.00363221	0.371267
AA699656	0.00366399	-0.402688
AA223929	0.00367551	-0.502518
AL137645	0.00367909	-0.478957
AA702582	0.00369469	-0.691907
AA603494	0.00370007	-0.497589
SGK494	0.00370135	-0.364197
TMEM37	0.0037138	0.412852
ZNF701	0.00373873	0.486888
LINC00921	0.00376581	0.400825
AI371550	0.0038018	1.96204
LOC100507507	0.00380671	0.242008
FGD3	0.00380679	0.271046
MOB2	0.00384337	0.276779
C2orf88	0.0038838	-0.482122
TEKT1	0.00392927	-0.398586
AA021559	0.00394837	-0.726631
GPR146	0.00396275	0.711746
AW022267	0.00402399	-0.520033
AA702963	0.00402861	-0.801408
BF840360	0.00407621	-0.630635
SMIM3	0.00415391	-0.322422
AI681558	0.00416292	-0.351803
TMEM154	0.00418325	0.341649
LOC101927609	0.00421041	-0.352618
C16orf72	0.00421712	0.230557
AW298119	0.00422325	-0.377866
MDM4	0.00422653	-0.21112
AI086336	0.00426382	-0.755663
ZCCHC10	0.00434363	0.267787
MRVI1-AS1	0.00436089	0.619382
AI802768	0.00440804	-0.938376
CSNK1A1	0.00443365	-0.23991
AI755057	0.00447957	-0.535331
LINC00324	0.00450122	0.450749
TMEM165	0.00457072	-0.286151
TNFRSF10D	0.00460254	0.461722
AI492953	0.0046117	-0.828409
OLIG1	0.00463552	-0.490632
DAP3	0.00466938	0.268139
AU145206	0.00467128	-0.46237
AK000115	0.00472021	0.61165
FBXO15	0.00472054	0.582494
AI459554	0.00474157	-0.783613
SRGAP1	0.00474435	0.551897
AL520533	0.00475413	0.873271
HEATR5A	0.00475971	0.350571
H95280	0.0047604	-0.541343
GLIS1	0.00477178	0.740184
LOC101928419	0.00478107	-0.343283
ZNF770	0.00478319	0.395556
TMEM102	0.00480581	0.775867
AA740831	0.00482259	0.684785
AA827728	0.00484709	-0.369526
BF435734	0.00485749	-0.405409
TBC1D10A	0.00486564	0.28182
CEP85L	0.00489259	0.199432
EVX1	0.00489446	0.443151
AI139993	0.0049763	-0.329795
ZNF316	0.00497668	0.279588
MON1B	0.00500115	0.21474
MYT1L	0.00500481	-0.866558
RHOH	0.00500605	-0.371213
PRCP	0.00503849	-0.368227
F11R	0.00507676	0.219088
AK026773	0.00509135	0.777365
STK32C	0.00512755	0.414831
AK027178	0.0051905	-0.403199
FAM120B	0.00521276	0.269455
PPFIA2	0.00522514	-0.95564
NF2	0.0052712	-0.382299
AW958449	0.00530653	0.663512
HOTAIRM1	0.00531957	-0.322826
AV735587	0.00536661	-0.42838
LINC00674	0.00537461	-0.202628
AI635756	0.00538471	0.409651
AI041546	0.00538637	-0.699476
ALKBH2	0.00539335	0.34195
AV659201	0.00540203	-0.860472
ABTB1	0.005517	0.332272
AF116717	0.00552619	0.723291
TUBB1	0.0055357	-0.74753
AI692696	0.00554538	0.595144
C10orf82	0.00557323	-0.672491
PDK4	0.00560561	0.83884
AW972669	0.00561715	-0.732337
BF509781	0.0056318	-0.513428
AW014375	0.00565556	-0.748664
AI627532	0.00568607	-0.601442
MCEMP1	0.00569028	0.506902
PRR5-ARHGAP8	0.00571185	-0.555258
AA830640	0.00579235	-0.719566
HECA	0.00579722	-0.228672
AW134485	0.00579782	-0.637577
BF542107	0.00581918	0.721849
AW242604	0.00583649	0.725279
CLN8	0.00590521	-0.25534
LONRF1	0.00591011	0.333741
SFXN2	0.00595677	0.214678
RAB12	0.00596169	-0.296357
TMEM41A	0.00597832	-0.203243
C19orf18	0.00598203	0.726192
C9orf135-AS1	0.00598528	0.653254
AU146893	0.00602304	-0.644058
AK027219	0.00603774	0.640276
HPS1	0.00605706	0.801995
KMT2E	0.00606388	-0.220563
FBXL19	0.00608402	0.596642
AA968473	0.0060994	0.644282
VAPB	0.00611019	0.301279
TCF7L2	0.0061378	-0.786681
SPDYE2B	0.0061832	0.49714
LINC00113	0.00618751	0.907697
N54783	0.00620629	-0.358904
SORCS2	0.00621424	0.847204
TEX38	0.00621788	-0.772566
GALNT10	0.00624212	-0.406635
FDFT1	0.00625376	-0.38056
B3GNT5	0.00625401	0.60229
IL10RB-AS1	0.0063081	0.546035
N45140	0.00631128	-0.414806
ZCCHC3	0.00636185	0.197009
TIMM21	0.00637115	0.301062
PSG5	0.0063722	0.592044
H23230	0.00644109	-0.549701
AU145367	0.006476	-0.631228
BE551451	0.00650517	-0.940764
AU145723	0.006509	-0.431249
ALKBH6	0.00651024	0.236922
SH3BP5-AS1	0.00663406	0.270336
SH3BGRL2	0.00664769	-0.430186
TMEM216	0.00666652	0.279884
BE747210	0.00669989	0.340023
CAPN1	0.00672441	-0.218863
LGR6	0.00672783	-0.467855
VCPKMT	0.0067884	-0.395247
IFIT2	0.00679695	0.473032
BG290999	0.00680198	-0.597852
THAP9	0.00681623	0.265391
CHTF18	0.00684956	0.404179
SNU13	0.00689018	-0.530404
S1PR5	0.00689859	-0.769917
TGDS	0.00696423	-0.270838
TMEM204	0.00698795	0.421491
HINT3	0.00708349	-0.345266
AK024242	0.00708536	-0.783414
RBM8A	0.00708934	0.192768
TMEM150C	0.00710231	-0.363919
AI761498	0.00711471	0.619121
AF090944	0.00712312	-0.417135
AI521765	0.00715384	-0.585442
AP4E1	0.00721744	0.186844
RAP1GDS1	0.00722187	-0.23705
BF512491	0.00723374	-0.38995
SYTL1	0.00728392	0.325889
NCK1	0.00732613	-0.23095
AI797163	0.00734081	-0.8269
UBE2F	0.00734228	-0.182874
AI023333	0.00737066	0.809257
LRG1	0.00737294	0.56792
AKIRIN2	0.00740966	0.248666
AU146731	0.00741032	0.798216
TLDC1	0.00742163	-0.442986
BE645256	0.00749213	-0.392185
CDH19	0.00753915	-0.718355
PAPD4	0.00757041	-0.250986
LOC101928160	0.00760555	0.494066
AI332638	0.00761651	-0.533933
AI076018	0.00762936	0.390199
ZNF346	0.00763716	-0.245964
AI475680	0.00764704	-0.405735
AA765841	0.00765285	-0.518163
GPATCH2	0.00772987	0.350428
WNT9A	0.0077385	0.763042
AI269471	0.00776395	0.619154
FAM98C	0.00780833	0.204094
ZFP90	0.00782675	-0.198506
KCNJ15	0.0078586	0.3922
AI078317	0.00789217	-0.557793
PTGDR	0.00789834	-0.401876
NBN	0.00790001	-0.324679
XG	0.00790125	0.679785
ASH1L	0.00794229	0.19631
AASDH	0.0079561	0.222022
C1orf228	0.00796061	0.277971
AI808348	0.00800191	-0.552335
AU145563	0.00802184	-0.411042
BE467801	0.00808522	0.699462
C1orf198	0.00810931	-0.243847
WDFY2	0.00815064	-0.200447
AF127771	0.00817178	0.681444
WDR55	0.00819314	0.253438
AW207701	0.00819665	-0.863436
AI822140	0.00826556	-0.621483
AI936551	0.00829139	-0.551914
REPS1	0.00836148	-0.183168
SRSF4	0.00838106	-0.275635
SLC25A25	0.00839853	0.361053
TEX9	0.00840863	0.986321
RAB6B	0.00841043	-0.659297
AF113013	0.00847196	-0.364362
CDC42SE1	0.00847677	0.227351
CCM2	0.00855949	0.270878
SNORA16A	0.00857803	0.265417
BCL2L12	0.00860426	0.481188
AA682539	0.0086247	0.839451
TMEM242	0.00862857	-0.230977
NT5C3A	0.00871215	-0.22374
AI473707	0.00874751	-0.689482
IGHV4-31	0.00875843	0.614624
LOC100129617	0.00879142	0.426397
AK025190	0.00883348	-0.611095
STEAP4	0.0088383	0.479325
AA766886	0.00885077	-0.394174
AV736334	0.00886592	0.381382
AI927957	0.00886842	-0.260443
MAGT1	0.00888645	-0.21074
SOX9-AS1	0.0088889	0.692288
AL117553	0.00900006	-0.323351
AW070371	0.00902103	-0.486508
BOD1L1	0.00905508	0.29612
R37780	0.00911253	-0.433032
HS1BP3	0.00913085	-0.459266
WBSCR28	0.00914923	-0.541242
AA524412	0.00920286	-0.278589
PLPP6	0.00922671	0.269625
AW966903	0.00927747	-0.33586
ANKRD13B	0.00930237	0.365406
AK026802	0.00940868	0.539658
POLR1B	0.00944259	0.251149
R07848	0.00945799	-0.266878
AMMECR1L	0.0094982	0.258836
AA478537	0.00951801	-0.224734
ANXA2R	0.00954743	0.222679
BG533580	0.00958274	0.438732
TPTE2P6	0.00965186	0.845057
TPTEP1	0.00966104	0.274224
RALGPS2	0.00966905	0.393192
RGCC	0.00973026	0.654267
MOB3C	0.00973808	0.203579
TRBV27	0.00979883	-0.532527
TMED5	0.00984936	-0.167956
BE674896	0.00985111	-0.297333
DGCR2	0.00987105	0.603093
SLC17A9	0.00987785	0.264601
COPZ2	0.00997009	0.745987
EIF1	0.0099987	0.395011
RFWD2	0.0100084	0.290035
ZNF91	0.0100281	0.345202
LOC101928269	0.01003	-0.506027
TMEM88	0.0100828	0.678853
TLE3	0.0101288	0.256133
FDX1L	0.0101414	0.377752
AI174988	0.0101866	-0.84897
PLIN5	0.0102476	0.382422
BROX	0.0102512	-0.157964
SERTAD1	0.0102655	0.345894
BF438058	0.0102757	-0.523916
SLC38A1	0.0102943	0.229809
USP8	0.0103315	-0.213672
AI459175	0.0103323	-0.49902
CLEC12A	0.0103365	-1.09445
LOC102724870	0.0103391	0.349711
AI686283	0.0103765	-0.739015
MYNN	0.0103955	0.189328
MMGT1	0.0103999	-0.163777
LOC101927933	0.0104014	0.181482
LINC01023	0.0104365	-0.540102
XPO1	0.0104425	-0.271344
KLF2	0.0104868	0.287118
TMEM8A	0.0105096	0.526547
CNKSR3	0.0105331	-0.41278
AI208857	0.0105351	-0.264022
N66045	0.0105379	-0.808169
AI949690	0.0105462	-0.30889
BF593928	0.0105486	-0.526658
AI807658	0.0105502	-0.403992
CCDC189	0.0105879	0.741534
FBXO27	0.0105949	0.587948
AW015517	0.010597	0.387012
GLRX3	0.0106523	-0.514604
KIAA1755	0.0106618	-0.690846
MIR6834	0.0106635	0.174808
NT5E	0.0106662	0.564118
T97999	0.0107244	-0.398396
BE327661	0.0107588	0.807283
TULP4	0.0107841	-0.830547
AMIGO1	0.0108162	0.277973
AW015588	0.0108425	0.330906
RAPH1	0.0109411	0.292679
AK000935	0.0109752	0.522679
AA938663	0.0109905	-0.865371
ZNF268	0.0110777	0.325425
AK025156	0.0110899	0.510739
SORBS1	0.0111144	0.696361
HR	0.0111399	0.624082
AI760944	0.0111721	-0.511015
CC2D1B	0.0111749	0.221868
R42281	0.0112033	-0.577383
NUP58	0.0112354	-0.257735
GARNL3	0.0112828	0.475722
MIR4458	0.0112839	0.61765
OTULIN	0.0113527	-0.233841
AU144915	0.0113744	-0.627519
SEC16B	0.0113806	-0.523074
N53787	0.0113949	-0.751178
AU146834	0.0114159	0.636713
DLG1	0.0114172	-0.286964
AW275093	0.0114424	-0.847284
GTF2A2	0.0114485	-0.192418
RCCD1	0.0114931	0.315268
AI808844	0.0114935	-0.664991
ANO9	0.0115022	0.385298
ZBTB20	0.0115762	-0.215986
SIAH1	0.0116282	-0.645041
AV649275	0.0116309	0.458206
SLC25A45	0.0116446	0.210024
LOC101930415	0.0116835	-0.41458
PTGES3L	0.0117574	-0.620097
LRPPRC	0.011778	0.528366
BF438300	0.0117869	-0.302025
LOC100996424	0.01182	-0.280606
NOBOX	0.0119537	0.72505
AI253193	0.0119643	-0.845747
AF119917	0.0119845	-0.277227
HHLA3	0.0120872	0.271627
BMPR2	0.0120937	-0.180701
BF591556	0.012102	-0.371075
EPC2	0.0121136	0.2355
AL133627	0.0121401	0.679334
ZNF274	0.0121523	-0.294771
BE502826	0.0121823	-0.394236
AW172407	0.0122057	0.350744
CDPF1	0.0122103	0.259765
MYO3A	0.0122715	0.656969
PPP1R35	0.0122901	0.227366
MGLL	0.0123608	-0.315847
DOCK8	0.0123634	0.207426
LOC101930306	0.0124008	-0.464047
N50912	0.0124182	0.592348
QKI	0.0124605	-0.287075
AV699953	0.0124617	-0.347519
JAML	0.0124756	0.319142
AW979196	0.0124805	-0.928495
LOC100128164	0.0124826	0.482472
ASXL1	0.0125046	-0.215221
DNAL1	0.0125275	-0.2202
BF977829	0.0125403	-0.371473
FKBP3	0.012555	-0.462539
AW274468	0.0125576	0.758787
IHH	0.0125737	0.487671
AK026499	0.012592	0.740363
VPS37D	0.0126062	0.645832
CYB5D1	0.0126529	0.198986
CENPBD1P1	0.0126548	0.263202
REL	0.0126575	-0.206597
AA983763	0.0127311	-0.683498
LOC100129884	0.0127394	0.420637
POC1B-GALNT4	0.0127644	0.293985
LOC100509457	0.012769	-1.54127
AU158358	0.0127758	-0.399528
AK024464	0.0128072	0.712634
SPATA13	0.0128099	0.219276
GABPB1-AS1	0.0128561	-0.299312
NANOS1	0.0128564	0.508919
VPS13A	0.012872	-0.264265
KBTBD7	0.0128745	0.359572
GOSR2	0.0128771	-0.172369
AI927309	0.0128888	0.572201
AF118077	0.0128923	0.488555
AA760738	0.0129092	-0.354458
AV646408	0.0130305	0.711147
ERICH4	0.0130671	-0.497063
INHBA	0.0130807	0.9215
BF000203	0.0130939	0.749098
AL110175	0.0131183	-0.262794
INO80C	0.0131323	0.212908
PRSS23	0.0131823	-0.568453
LCN10	0.0131893	0.303005
R49645	0.0132002	0.718166
SPX	0.0132186	-0.845514
AU144916	0.0132217	-0.437723
CHD1L	0.0132632	-0.292127
SLC2A12	0.0133281	0.50145
ZSCAN30	0.013357	0.229613
IFNGR1	0.0133665	-0.41879
TRMT6	0.0134142	0.287284
BE044360	0.0135076	-0.769986
BE549780	0.0135366	-0.309922
AAED1	0.0135569	-0.334298
PPP1R2	0.0135767	-0.234804
ZNF691	0.0136328	0.495469
CENPBD1	0.0136853	0.263305
AA482478	0.0137124	0.59081
AU147992	0.0137171	-0.177788
SAMD13	0.0138793	-0.324381
SCAF4	0.0138953	-0.218067
LOC100289230	0.0138994	0.372179
RSBN1L	0.0139409	0.272184
HEPN1	0.0139922	0.625542
THSD7B	0.0140205	-0.596566
ANKRD18B	0.0140284	0.529037
TCERG1	0.0140676	-0.379881
AU144005	0.0140736	-0.53742
LAMTOR3	0.0140755	0.254471
AK027170	0.014089	-0.638727
CGN	0.0141511	0.502311
TBRG1	0.0141658	-0.166653
ZNF704	0.0141963	-0.324714
TOM1L1	0.0142568	-0.830012
AW196940	0.014313	-0.777241
AI953040	0.0144073	-0.32785
RAVER2	0.0144238	-0.860915
OSM	0.0144454	0.618479
ZFAND6	0.0144796	-0.517718
DAAM1	0.014582	-0.247547
IL21R	0.0146181	0.345329
LINC01554	0.0147421	0.879933
MSL3	0.0147547	0.250757
SLF2	0.0148524	0.691908
BF476152	0.0149057	-0.524038
AI127738	0.0149475	-0.278962
AI380514	0.0149594	-0.269644
TRIM62	0.0150766	-0.58631
AA883831	0.0151011	0.638964
UBTF	0.0151763	0.177875
AW503542	0.0151853	-0.344434
LPCAT4	0.0152218	0.320245
TMEM25	0.0152624	0.304847
AW136901	0.0153214	0.270505
AP1AR	0.0153457	0.30469
LINC01187	0.0153831	-0.382423
BCL2L11	0.0154791	0.154971
AW195928	0.0154982	-0.36711
TET1	0.015571	0.424867
AI911084	0.0155911	-0.855075
AI741597	0.0156142	-0.737924
AW963634	0.0156278	-0.359212
AL359567	0.015722	-0.485001
AW627671	0.0157257	0.950449
MUSK	0.0157394	0.525428
LOC102724951	0.0158643	0.471034
CRIM1	0.0159173	-0.311217
MAD2L1	0.0159189	0.42039
SGK223	0.0159202	0.402551
AI149880	0.0159791	-0.358539
TAS2R14	0.015981	-0.451083
PHF23	0.0160586	0.296158
LOC729461	0.0160821	0.801349
AI791832	0.0161808	-0.67059
SP110	0.0161844	-0.247871
C10orf88	0.0162561	0.263281
WAC-AS1	0.0163443	-0.173294
GINS2	0.0163546	-0.661338
AA833902	0.0163909	-0.342128
MATR3	0.0164233	0.280776
RNF40	0.0164992	0.503112
ZNF226	0.0165294	0.379772
CNTNAP3	0.0165494	0.899447
KLHL36	0.0165531	0.212069
ZNF638-IT1	0.0165701	-0.362771
AA665058	0.0166537	0.515754
C2orf68	0.0166907	-0.164766
AF143882	0.0167833	0.518312
ND4	0.0169427	0.113711
MCM6	0.0169624	-0.753804
OLFM2	0.0169972	-0.452736
RANBP2	0.017013	0.316824
FKSG49	0.01704	0.33573
YPEL1	0.0170445	-0.281301
AW771958	0.0170668	-0.502477
KCNC1	0.0170892	-0.75653
TLR6	0.0170969	0.57791
ZNF683	0.0171131	0.359321
PARP10	0.0171141	0.253291
AU149960	0.0171555	-0.781274
FAM184B	0.0171673	-1.05323
N25555	0.0172447	0.480172
AW876066	0.0172528	0.758018
DOCK9	0.0172839	-0.589506
KLF3	0.0173045	0.17556
AA928078	0.0173797	0.584548
SMG1P5	0.0174131	-0.344262
TBXAS1	0.017414	0.352875
CSTL1	0.017427	-0.51994
MIR6840	0.0174302	0.278287
TPH1	0.0174303	-0.612499
BF723605	0.0174416	-0.658833
AW023610	0.0174905	-0.709004
AI742744	0.0175829	0.602381
AI990122	0.0175905	-0.38946
AV646177	0.0175975	0.399965
U2AF1	0.0176053	-0.339086
BF843343	0.0176099	-0.628709
ACTR3C	0.017644	-0.754508
BTF3	0.0176534	-0.854569
ERP27	0.017677	-0.187479
FGFBP2	0.0176989	-0.626924
CNTNAP3B	0.0177003	0.592907
SRSF1	0.0177207	-0.228492
SYT11	0.0177559	-0.658785
AI142126	0.0177892	-0.50124
AK024563	0.0178401	-0.271552
R71414	0.017925	0.315149
CNOT6L	0.0179451	-0.162695
BE669486	0.0179997	-0.5128
AA908970	0.0180053	-0.374435
SYNCRIP	0.0180877	0.515952
SLC25A33	0.0181273	-0.240185
PAPOLG	0.018178	0.200085
SLC44A5	0.0182281	1.09275
LOC101927972	0.0182463	-0.797839
FKBP11	0.0182738	-0.304756
LOC100507616	0.0182812	0.625387
AI680875	0.018327	-0.36823
TMEM175	0.0183739	0.247106
SPINT1	0.0184478	0.542829
SNX14	0.0184743	-0.169877
NUDT16	0.0184824	-0.230284
VMP1	0.0185038	0.578201
CABP7	0.0185241	-0.525005
GNB4	0.0185315	-0.281517
R40515	0.0185394	-0.397565
SOX12	0.0185618	0.356927
AK026259	0.0185756	-0.765923
RAB32	0.0185818	-0.321955
BE674964	0.0186185	-0.319583
AI088361	0.0186653	0.667379
ACAA2	0.0187187	0.570669
ZNF862	0.0189301	-0.272566
BF055156	0.019037	0.957545
TMEM217	0.0190643	-0.74981
CEP78	0.0191014	-0.260743
BF063235	0.0191148	-0.268996
LOC101928718	0.019217	0.450325
MIR4435-2HG	0.0192977	-0.636758
AW665321	0.0193388	-0.408482
CCDC71L	0.0193518	0.258771
METRN	0.0194188	0.471114
PRPS2	0.0194401	-0.348597
BF676361	0.0194765	-0.427509
TTC21A	0.0194882	0.403529
AK025045	0.0195132	-0.423222
N72610	0.0195262	-0.411637
AK021554	0.0195381	-0.500568
SYTL3	0.0195609	-0.274593
SPRYD3	0.019598	0.259429
ALPK2	0.0196255	-0.469028
NANS	0.0196383	0.558237
UQCR11	0.0196649	0.375912
BF509725	0.0197201	-0.3001
AW575183	0.019794	0.216508
SLC6A4	0.0197961	-0.601665
SLC24A4	0.0198013	0.468603
TRPT1	0.0198038	0.272655
C11orf70	0.0198155	-0.584264
NEK5	0.0198637	0.405136
AI973033	0.0198701	-0.625903
AI743236	0.0198854	0.424588
H79994	0.0199397	-0.764084
NOP58	0.0199419	0.264425
TRAF3IP1	0.0199759	0.34227
MEX3D	0.0199769	-0.604306
PCED1B-AS1	0.0199775	0.32408
MICAL3	0.0200779	0.270978
FAM174A	0.020173	0.334585
AK022413	0.0201732	0.644957
AI076172	0.0201793	-0.433364
AIF1L	0.0202236	0.31834
RNF34	0.0203377	-0.2121
DNAJC1	0.0203526	-0.199283
AADACL2	0.0203557	0.776946
AW003130	0.0204158	-0.646861
AW136853	0.0204555	0.520089
MBLAC2	0.0204967	0.272324
C3P1	0.0205656	0.498087
LOC648987	0.0206703	0.505998
SLC22A8	0.0206969	0.500576
AI218357	0.0207209	-0.695639
ASB3	0.0207236	0.371213
AI798680	0.0207348	-0.338801
TCEA2	0.0207562	0.448551
TRABD2A	0.0208339	0.257134
AU154905	0.0209121	-0.605878
AI916641	0.020917	-0.514707
C19orf12	0.0209602	0.214434
AU155234	0.0209828	0.296307
BF679700	0.0210063	-0.318829
AI034356	0.0210864	-0.752558
AI638020	0.0211019	0.807281
AV724266	0.0211086	-0.300982
HSF5	0.0211235	0.562977
FEM1A	0.0211361	0.167573
LRRC4	0.0212348	0.570511
EWSR1	0.0212397	0.209977
W84667	0.0213019	-0.435408
AI057404	0.021404	-0.310133
RNF181	0.0215721	-0.170032
ZNF561	0.0215845	0.234159
BE219874	0.0216272	-0.574413
AK026267	0.0216605	0.716604
LYSMD3	0.0216687	0.420707
ERC1	0.021698	0.1453
PSMB4	0.0217291	-0.347986
RBPMS2	0.0218484	-0.392677
AK024881	0.0218713	0.484911
LOC285812	0.021923	-0.216414
IFNAR1	0.0219724	0.299605
AW452384	0.0219913	-0.508725
W86659	0.0220194	-0.490914
DHFR2	0.0220273	0.262618
HBP1	0.022093	-0.417836
AMN1	0.0221047	0.268615
INTS2	0.022107	0.323838
PLEKHA7	0.0221534	0.479268
KIF23	0.0221555	0.710784
LOC440173	0.0221953	-0.718899
ESAM	0.0222619	-0.502648
N62830	0.0222722	0.68473
CREB5	0.0222886	0.557238
SLC35F1	0.0223094	-0.443524
BICDL1	0.0223309	0.265635
ROR1	0.0223377	-0.880158
ATXN7	0.0223531	0.333018
ENDOV	0.0223656	0.14756
ACTRT3	0.0224109	-0.520462
GFI1B	0.0224353	-0.727033
LOC102723779	0.0224771	0.225685
RPS27L	0.0224919	-0.28278
CEMP1	0.0225106	0.53296
PLEKHG4	0.0225127	0.227238
AI493509	0.0225965	0.545033
PHF13	0.0225969	0.173953
R39769	0.0225972	-0.654069
UQCC2	0.0226353	0.439818
WDR5	0.022687	0.248859
PROSER2	0.0227725	-0.329333
SLC35C2	0.0227963	0.158473
LOC100506235	0.0228034	0.486498
AI560305	0.0228098	-0.572003
AV702197	0.022858	-0.535357
AW241482	0.0229075	-0.67226
NAMPT	0.0230068	0.701145
AA825563	0.0230071	0.347814
NAAA	0.0230413	-0.245165
AK022136	0.0230783	-0.292607
CUL1	0.0231783	-0.490894
AU145607	0.0232732	-0.47955
TNRC6C-AS1	0.0233017	0.208188
ZNF610	0.0233137	0.324789
AA778674	0.0233703	0.645253
BF514597	0.0234133	0.54187
APOL4	0.0234177	-0.462636
FIGN	0.0234191	-0.347061
FUT10	0.0234857	0.244844
BE552357	0.0235824	-0.312216
PGBD4	0.0236218	0.40149
LOC91548	0.0236392	0.339052
PTPN22	0.0236419	0.352285
AI939535	0.023677	0.634734
FAM65A	0.0237411	0.576357
G3BP1	0.0238426	0.11669
CIRBP	0.0238666	0.247996
AI821649	0.0238774	0.547665
LFNG	0.0239283	0.393015
MEF2A	0.024024	-0.285668
MS4A1	0.0240251	0.293867
WWC2-AS2	0.0240348	0.314246
KY	0.0240552	0.624023
AW161921	0.0240661	-0.540008
BF510198	0.024069	0.694656
TOM1L2	0.0240765	0.232831
ARF1	0.0240777	-0.392359
BE855713	0.0240984	0.392495
AA772075	0.0241313	0.514354
STK35	0.0241383	0.160742
PHF5A	0.0241601	0.289318
RBFOX1	0.0242506	0.473698
AI343473	0.0242776	-0.643486
AL137510	0.0244494	-0.301996
AI656728	0.0244867	-0.344828
BE043033	0.0244999	0.312644
SCFD1	0.024532	-0.717972
ACER2	0.024563	-0.693931
RHEB	0.0245669	-0.214532
NDUFAF5	0.0246161	-0.191064
PSPC1	0.0246276	0.148473
TMEM191A	0.0246792	0.602337
MLX	0.0246916	0.372933
FAM223B	0.0247145	-0.363018
AK024681	0.0248391	0.32471
AU158316	0.024845	-0.317016
P2RX7	0.0248505	-0.271633
AU152753	0.0248595	0.71631
BF222929	0.0248662	0.338704
AI955765	0.0248873	-0.31452
AK025378	0.0249817	-0.481063
POLB	0.025097	-0.408448
ZBTB9	0.0251166	0.264372
TMEM99	0.025125	0.274726
FAM24A	0.0251526	-0.537772
AI623184	0.0252162	-0.44629
LOC101060747	0.0252685	0.146009
BG536728	0.0252845	-0.342817
BE219036	0.025386	-0.613812
RARA-AS1	0.0254398	0.297029
NMD3	0.0255252	-0.16881
PDGFC	0.0255584	-0.727005
HNRNPA2B1	0.0255692	0.180991
CBFA2T2	0.0255926	-0.223509
ITPR3	0.0255934	-0.672958
PRKCB	0.0256084	-0.181441
USP34	0.0257331	-0.266727
AI123296	0.025783	0.751849
PCGF5	0.025783	-0.172809
PSAT1	0.0258232	0.378848
QSOX2	0.0258387	0.261762
AI740629	0.0258606	-0.533176
LOC105378349	0.0258701	0.274444
AI150518	0.0259317	-0.762018
ZNF607	0.026075	0.501491
AA002064	0.0261576	-0.329554
LOC100506371	0.0261746	0.564546
DYNC1H1	0.026181	-0.245122
COLCA2	0.0262	0.572328
AA977218	0.0262176	-0.311029
ETV3	0.0263041	0.213249
SLC35C1	0.0263429	0.54094
TXNDC16	0.0264331	-0.221073
BF057809	0.0264363	0.743931
AL157467	0.0264848	0.351919
AW139719	0.026491	0.334418
CHST6	0.0268665	-0.346462
MED28	0.026901	0.160595
SPNS3	0.0269517	0.544167
AW293296	0.0269643	-0.426046
NFYA	0.027004	0.192259
NDUFV1	0.0270241	-0.391923
AW473883	0.0270423	-0.672961
AI825538	0.0270957	0.780266
OPALIN	0.0271071	0.334868
PRPF38A	0.0271772	0.142433
SEMA4B	0.0272019	0.302271
GGT7	0.0272081	0.406245
SETD9	0.0272358	-0.298882
LOC101930081	0.0272548	0.689728
TSPAN18	0.0272973	0.292882
PTAFR	0.0273051	0.260293
R95743	0.0273471	0.494399
PCDHB7	0.0274106	-0.716799
AI378685	0.0274392	-0.316942
AL137305	0.0274799	0.704125
MIR99AHG	0.027576	0.860672
RABGAP1L	0.0276579	0.240602
TXNDC11	0.0276881	0.281604
RIF1	0.0277554	0.208368
AI356405	0.0277603	-0.227474
TMF1	0.0278449	-0.179568
AK026294	0.027856	-0.394747
LINC00238	0.0278586	-0.793794
AI671903	0.0279001	-0.303545
AA418878	0.0279601	0.702552
MYLK	0.0280195	-0.418265
CNTD1	0.0280232	-0.543102
PTPRD	0.0282342	-0.76899
CCDC97	0.0282484	0.19073
GRK4	0.02825	-0.400806
AI363185	0.0282753	-0.407622
NABP1	0.0283544	0.350303
BE674989	0.0283697	-0.256813
CWC22	0.028411	0.271103
SOX6	0.0284816	-0.220782
DERL3	0.0285727	0.231176
AI684424	0.0286726	-0.613335
KLHL14	0.0286828	0.326987
HOXA7	0.0287916	-0.626483
VTI1A	0.0287927	-0.197624
AA262084	0.0288283	-0.335895
RPL14	0.0288431	-0.139099
ZNF703	0.0288456	-0.556733
ALG2	0.0288515	0.212728
PSMA3	0.0288914	-0.312445
AI634355	0.0289706	0.441776
BHMT2	0.0289921	-0.562935
AA747291	0.0290754	-0.317643
PYCARD-AS1	0.0291521	0.476077
BF197091	0.0291533	-0.635715
LINC00844	0.0292074	0.811751
PROK1	0.0292501	0.60817
FRG1EP	0.02928	-0.654634
LOC102723932	0.0294282	0.547385
RASSF1-AS1	0.0294373	-0.609144
ZXDC	0.0294426	-0.141798
FAM114A1	0.029484	0.659595
ZNF253	0.0295796	0.344738
VPS29	0.0295914	-0.128541
AI521883	0.0296701	-0.275451
VTI1B	0.0296958	-0.163024
AI393727	0.0296968	-0.561952
CDH6	0.0296992	0.529682
FAM46A	0.0297068	-0.341661
APMAP	0.0297701	-0.217352
BRWD1	0.0297945	-0.192032
EGFLAM-AS2	0.0298215	0.562852
TRIO	0.0298281	-0.339514
ITFG1	0.0298808	-0.266504
AI742686	0.0298823	-0.425246
PTPN9	0.0300573	-0.304063
PMEPA1	0.0300698	0.426037
BF112218	0.0301139	0.794707
AW978350	0.0301214	-0.577363
HMGCS2	0.0301349	0.407261
BE502965	0.0302141	-0.493874
MTURN	0.0302538	-0.273003
ZNF25	0.030259	-0.272157
KDM2B	0.0302778	-0.149965
AI871508	0.0302883	0.542952
BE463783	0.0303397	0.843478
USP35	0.0305178	0.26726
RHBDL3	0.0305325	-0.370939
LOC102723600	0.030535	-0.533262
ZNF628	0.0306538	0.422044
DHRS9	0.0306577	0.316385
MRPL38	0.0306923	0.200843
PCMTD2	0.0307235	-0.278171
PGAP1	0.0307278	-0.295055
RNF135	0.030729	-0.205863
EIF2AK3	0.0308052	0.734898
KIAA1143	0.0308848	0.186117
FSIP2	0.0309036	-0.737817
TMEM185B	0.0309301	0.517294
BG485129	0.0310206	-0.410949
C5orf66-AS1	0.0310791	-0.667438
CD274	0.0311129	0.18219
TBC1D10C	0.0311643	0.254567
PAX1	0.0311894	0.532194
COX6A1	0.0313606	-0.318205
RAD23B	0.0313981	-0.23073
AL109783	0.0314054	0.526457
APBB1IP	0.0314171	0.23855
HMGB4	0.0314173	-0.54263
ELAVL4	0.0314293	-0.434128
AI870903	0.0314333	-0.314736
EPHA8	0.0314391	0.283833
INAFM2	0.0314661	-0.239878
MTMR14	0.0315367	-0.305669
DNLZ	0.0315646	0.237307
GRIPAP1	0.0316073	0.235539
FBXO6	0.0316654	-0.316221
FAM122A	0.031674	0.176467
AI034351	0.0318274	-0.626062
T97301	0.0318711	0.646364
POLR3H	0.0318867	0.178884
TANK	0.0318887	0.55018
SEC14L3	0.0319769	0.43994
AW293239	0.032003	0.580455
LOC105373383	0.032081	-0.622646
T91029	0.03216	-0.715419
MRPS18C	0.0321653	0.224071
C2CD3	0.0321812	-0.645557
ZFAND2B	0.0322177	0.248634
MMP8	0.0322495	0.821126
FOXP4	0.0322805	-0.296433
AI857412	0.0322837	0.639586
LTBP2	0.0322866	0.407638
LOC101928323	0.0323173	-0.417938
SEC14L1	0.0323697	-0.686566
RASL11B	0.0323947	-0.517919
PARD6B	0.0324211	0.762322
AA504346	0.0324523	0.94449
AW205877	0.0324527	-0.460097
LRRC3	0.0324714	-0.359773
SNX22	0.0325294	0.236708
PPP4R2	0.0325946	0.176719
RNPC3	0.0326166	-0.183386
AW014249	0.0326472	0.671253
BE551146	0.0326539	0.591953
KLHL6	0.0326776	0.2668
LINC00396	0.0326882	-0.667079
MIR6751	0.0327559	0.168355
PIF1	0.0327789	0.564821
BF514781	0.0327885	-0.507402
ZNF460	0.0328634	0.668022
AA06	0.0328738	0.560941
KDM3A	0.0329107	-0.805172
ERN2	0.032979	0.485163
AI733637	0.0330034	-0.393446
CR1L	0.0330301	0.279651
C9orf142	0.0330806	0.320173
TBX3	0.0330996	-0.252289
AU155384	0.0331139	-0.870978
LINC00993	0.033162	0.470943
CEPT1	0.0331723	-0.393208
ERICH6	0.0331944	-0.720956
AI198829	0.0332404	0.302062
FAM124A	0.0332906	-0.435107
AA922213	0.0333282	-0.637331
AI694327	0.0333478	-0.572242
DSCR8	0.0333964	0.521952
MRS2	0.0334431	-0.573217
FAM171A2	0.0334602	-0.272149
BF110534	0.0334852	0.434536
GPAT3	0.0334939	0.358264
EMSY	0.0335422	0.159386
MRPS6	0.0335439	0.173011
LINC01191	0.0336014	0.304374
OPRK1	0.0336071	0.668143
HGS	0.0336271	0.388778
NAP1L5	0.0336277	-0.344407
LOC100240734	0.0336371	0.386007
H71242	0.0336393	-0.326743
NFAM1	0.0336954	0.249478
T86874	0.0337706	-0.746914
OSTM1	0.033846	-0.210741
AW629478	0.0338466	-0.670163
INPP5F	0.0339716	-0.211692
ZNF426	0.0339718	0.23093
TARDBP	0.0340104	0.162396
ALG9	0.0340348	0.219048
BE646288	0.0341394	0.641255
AI283051	0.034142	-0.421186
SPPL2A	0.0341693	-0.140374
KRTCAP3	0.0342201	0.441748
BF724206	0.0343926	-0.367757
PTPMT1	0.0343931	-0.146935
ZNF670	0.0344169	0.775825
LY6G6F	0.0344476	-0.529498
AI088104	0.034499	-0.822447
BE620258	0.0345328	-0.185749
BF511342	0.0346282	0.38497
PPP1R12C	0.0346565	0.23588
SIPA1L3	0.0347819	-0.338757
AW015140	0.0348412	-0.534302
R98192	0.0348426	-0.721105
AK025324	0.0348527	-0.605878
FRMD3	0.0348916	-0.288158
GGACT	0.0349276	-0.183786
FAM76A	0.0349393	-0.212245
BF940192	0.0349826	-0.328384
FHDC1	0.035007	0.284921
TJP2	0.0350178	-0.324624
ITPKB	0.0350827	-0.240234
DUOXA2	0.0350918	0.416645
NUF2	0.035127	0.607001
GPATCH4	0.0351804	0.146028
STK40	0.0353432	0.296535
AA702999	0.035397	-0.419607
GGCX	0.0353988	0.376562
SFT2D3	0.0354812	0.130844
RNF24	0.0355406	0.295465
LINC00936	0.0355684	0.428286
SEC61A1	0.035599	0.331229
C4orf32	0.0356298	-0.214383
AK022083	0.0359832	-0.596971
TMEM43	0.0360741	0.163322
ST8SIA4	0.0361252	0.381632
AL038191	0.0361418	-0.322783
DCAF5	0.0361622	-0.137587
RPL22L1	0.0362346	-0.26147
AI076365	0.0362351	0.637835
ADARB1	0.0363458	0.448825
FRMPD3	0.0363682	0.523276
NSMCE2	0.0364288	-0.155
DMXL1	0.0364413	-0.348264
CXorf56	0.0365254	0.836602
SLC30A2	0.0366263	-0.283303
CCDC17	0.0367377	0.28635
ATP2A3	0.0368242	-0.27036
AI798899	0.0368283	-0.539289
AK025359	0.0368533	-0.40077
AL038125	0.0368696	-0.501166
CCNB1	0.0369107	0.838353
BF528429	0.0369865	0.651709
AW296081	0.0371174	0.423423
FAM43A	0.0371513	0.334432
W68845	0.0371621	-0.194884
UFL1	0.0372255	-0.764335
BF433570	0.0374156	0.785435
FBXO7	0.0374214	-0.294096
UTP4	0.0374341	-0.189427
AK022308	0.0374632	-0.313952
MIEF2	0.0374951	0.299654
AA704537	0.0375665	-0.611547
ANK3	0.0375967	-0.294121
AK024935	0.0376146	-0.3525
NRP2	0.0376407	0.213961
ESPN	0.0376826	0.423584
CCDC163	0.0377036	0.307238
LOC100996578	0.0377154	0.235669
43170	0.0377425	0.635763
ZNF71	0.0377431	0.217862
ZFYVE16	0.0377589	0.486316
ZNF283	0.0378399	0.731255
AW576448	0.0378645	-0.651261
LOC101929122	0.0379162	0.603576
LINC01123	0.0379221	-0.481644
PLIN4	0.037954	0.557671
LOC100505715	0.0380608	0.338865
DIDO1	0.0381225	0.244243
UBE3D	0.0381418	-0.377357
AW850611	0.0381459	-0.331345
DNAJB11	0.0381948	0.142436
AU144570	0.0382057	-0.562844
NR2F2-AS1	0.0382354	-0.382686
BE857689	0.0382842	-0.637499
SYNGAP1	0.0384239	0.185264
LOC100653296	0.0384349	0.639652
TSPAN33	0.0384871	-0.263485
LOC100996579	0.0385225	-0.333009
AI797677	0.0385794	-0.248843
KIF1C	0.0385918	-0.434218
ANO6	0.0386184	-0.188054
FCRL1	0.0386385	0.328805
PARVG	0.0386492	0.19513
AA436887	0.0386777	-0.391025
CNTN2	0.0387204	-0.591323
RBM5	0.0388321	-0.223728
BF725688	0.0388656	-0.531338
DHRS7	0.0388833	0.338399
BE672140	0.0388865	0.625825
CHAF1A	0.0389376	0.633431
MAGI2	0.0389622	0.594668
MRPL27	0.0390692	0.177549
AI972599	0.0390997	-0.198751
RAB27B	0.0391586	-0.308577
PATE2	0.0392141	0.472395
PRKAG2	0.039218	0.182443
AI096786	0.0392325	0.491858
AU146536	0.0392905	0.477892
BF510265	0.0394471	0.423031
NATD1	0.0394475	0.208569
ZNF81	0.03946	0.157869
BF109132	0.0394601	0.331446
ABCA5	0.0394659	-0.67821
U2SURP	0.0394786	-0.317884
CBLN2	0.0394967	-0.503437
NAPSB	0.0395392	0.326928
BE503322	0.039546	0.629682
AW298167	0.0395462	-0.462589
SDR42E1	0.0395766	0.293455
AI224894	0.0395793	0.582704
LOC105369507	0.0396204	-0.436317
BE670493	0.0396915	0.781112
CDCA7L	0.0396934	0.23504
C12orf76	0.0397267	-0.153771
KAT6A	0.0397667	0.170008
MRPL52	0.0398107	0.248337
RSPH14	0.0398628	0.475705
TMEM238	0.0398804	-0.586902
CPNE5	0.0398837	0.332834
USP45	0.039895	0.243182
KCTD20	0.0398991	-0.144154
AA693937	0.0399003	0.537079
AFTPH	0.0399585	0.169244
AI432451	0.0400316	-0.515699
CWC25	0.0401085	0.238701
AK022022	0.0401274	0.586002
ZCCHC17	0.0401641	-0.137259
MLXIP	0.0402241	0.148877
SLC16A10	0.0402633	0.409902
TINCR	0.040264	0.251671
AI740573	0.040268	-0.532423
ZNF880	0.0403012	-0.236385
BG541187	0.0403585	-0.478369
C19orf33	0.040391	-0.64801
ZC3H13	0.0404006	0.280318
LOC100506206	0.0405149	0.299254
RIMS2	0.0405367	0.759808
AI652647	0.0405686	-0.600707
MRGPRF	0.0406484	-0.609643
CCNE1	0.0406844	-0.589203
EFCAB2	0.0407375	-0.267832
MRVI1	0.0407505	0.35175
AF083118	0.0407734	-0.378632
IFT81	0.0408553	-0.633427
CDK14	0.0408731	0.389633
T75499	0.0408993	0.807718
ZNF837	0.0409318	0.544843
ZNF320	0.0409732	0.224029
AL049254	0.0410922	0.322386
TARS	0.0411016	0.419554
C5orf15	0.0412646	-0.524195
N95440	0.0413697	-0.345372
DYM	0.041399	-0.169345
AW850555	0.0414495	0.448694
AW379042	0.0415661	-0.26708
AI419966	0.041579	-0.551066
MED31	0.0416239	0.201908
AU151864	0.0416491	0.308647
TOX3	0.0416992	0.338805
ANGPTL4	0.0417004	0.511265
AA935659	0.0417508	-0.416336
AI821136	0.0417915	-0.727988
ARL10	0.0419375	0.186071
NRXN3	0.0419525	0.590968
SETD4	0.0419569	0.60165
H93721	0.0420469	0.356884
BTBD11	0.0420484	-0.200322
AW511271	0.042064	-0.293549
BF110153	0.0421049	0.420278
BE669703	0.0421533	0.353322
THRAP3	0.0421914	0.225167
SLC20A1	0.0422309	-0.256526
WASH1	0.0422518	0.196042
AI684551	0.042335	-0.491825
RADIL	0.0423929	-0.469862
GGT1	0.0423971	0.359338
AW668616	0.04242	-0.690315
MRFAP1	0.0424457	0.12131
PDE5A	0.0424724	-0.372243
AK026725	0.0425025	-0.308513
BRWD3	0.0425765	0.194014
TRIM41	0.0426765	0.158545
LOC101930655	0.0427175	-0.148311
CR1	0.0427177	0.259084
METTL23	0.0427994	0.122298
ID2-AS1	0.0428384	-0.205197
SWSAP1	0.0428518	0.163802
EIF3B	0.0428822	-0.168392
AI733797	0.0429088	0.578993
IDI2	0.0429262	0.180296
C17orf80	0.0430037	0.169705
PURG	0.0430588	0.480443
ITCH	0.0430598	-0.247379
AU146027	0.0431572	-0.292028
CYMP	0.0431696	0.6162
AA761055	0.0432208	0.318658
AI161428	0.0432385	0.317847
PPIL3	0.0432664	-0.25149
LOC100131662	0.0432729	0.569156
TMEM87A	0.0433426	-0.345362
AW086258	0.0433674	0.717013
AK025137	0.0433854	-0.359066
IGF2BP1	0.0434551	-0.288372
AY010114	0.0435377	0.399929
AI698001	0.0435743	0.502847
AI014551	0.0436727	-0.410745
SHKBP1	0.043688	0.210291
PCGEM1	0.0437436	0.474729
H97875	0.0437918	-0.721577
BF512871	0.0438148	-0.306437
AW293315	0.0438188	-0.333263
TMED10	0.0438666	-0.411705
CEP19	0.0438785	0.443802
AK023440	0.0439995	0.413905
AI792896	0.0440403	0.683064
BF115793	0.0440499	-0.204385
TAF15	0.0440899	-0.222765
MVK	0.0441479	-0.492679
BF109952	0.0441956	0.599946
CMTM5	0.0442209	-0.374921
USP9X	0.0442757	0.280211
AI885066	0.044364	-0.185132
COPS4	0.0444022	-0.533398
AI079134	0.044425	-0.737166
GINS4	0.0444346	-0.280266
AK027226	0.0444382	0.813909
R40701	0.0444471	0.858158
TMEFF2	0.0445437	0.31864
TSPY26P	0.0445689	0.351826
AF017336	0.0446552	-0.394648
AKAP5	0.0446604	-0.557598
AF208859	0.044753	0.371079
BF511336	0.0447905	-0.258202
FLJ40288	0.0448424	-0.242191
TSC22D1	0.0448725	-0.243621
AW593931	0.0448753	-0.3734
FNBP1	0.0448899	-0.267317
ZNF493	0.0448912	-0.217506
KIAA1324	0.0449014	0.487118
TMEM40	0.0449315	-0.44381
LOC90246	0.0450662	-0.400833
AI953708	0.0450901	-0.583586
AW290978	0.0450914	-0.267355
NANOS3	0.0452194	-0.38592
ATOH8	0.0452265	0.41592
CNOT2	0.045278	-0.40562
AI733642	0.0452936	0.757927
CA5BP1	0.0453185	-0.223995
AI539443	0.0453194	-0.318736
R68807	0.0453286	-0.722289
MBD6	0.0453428	0.176385
AI242023	0.0453792	-0.298116
POLR1D	0.0453979	-0.177013
TMEM57	0.0455403	0.396197
AA702961	0.0456047	-0.39151
SLC11A2	0.045691	0.544544
LINC00664	0.0456996	0.503827
ZNF496	0.0457141	0.197134
AA702409	0.0457505	-0.241262
PTGS1	0.0458421	-0.330645
LSM8	0.046062	0.184252
CHST11	0.046136	0.214726
MIR4307HG	0.046149	-0.675106
TRAF6	0.0462106	-0.340422
LOC93444	0.0462432	0.253866
ZNF527	0.0462754	0.513792
PTPN21	0.0464004	0.66635
GEMIN5	0.046422	0.348416
FBXO32	0.0464382	0.161127
AI936859	0.0464527	-0.358315
ST6GALNAC1	0.0465138	0.577943
ZDBF2	0.0465397	0.388751
ANKRD19P	0.046604	-0.581165
LOC102606465	0.0466314	0.181881
R51853	0.046737	-0.805216
LOC102724561	0.0467622	0.210852
RAB35	0.0468489	0.196599
AA534466	0.0470179	-0.637343
CMPK1	0.0470363	-0.152542
BF109370	0.0470456	-0.232823
SYNJ1	0.0470707	-0.67648
INF2	0.0471255	-0.267656
LEO1	0.0471359	0.213746
ALG14	0.0471385	0.35062
LOC101060391	0.047158	0.647824
RASSF10	0.0472479	-0.629175
KIRREL2	0.0472564	-0.445295
TMEM184A	0.0473451	0.385669
VMA21	0.0473481	-0.119835
F09245	0.047364	0.442265
CDH24	0.0474857	0.492265
COG1	0.0475653	-0.149736
AI684640	0.0476108	-0.495732
AA969211	0.0476305	-0.392244
ITGA11	0.0476309	0.389876
ATP6AP1L	0.0476693	0.49939
ZNF598	0.0477208	0.29784
PRDM15	0.0477616	0.132798
TTTY13	0.0478599	-0.560842
BF514098	0.0479056	0.980768
LOC102723809	0.0479381	-0.305859
H07100	0.0480197	-0.615232
FLJ39051	0.0481565	0.379752
AU144781	0.0481921	-0.310068
C12orf65	0.0481985	0.244956
DYX1C1-CCPG1	0.0482019	0.63901
FAM46C	0.0483304	0.361415
SEMA4A	0.0483356	-0.256601
MPV17L2	0.0483391	0.213836
COL25A1	0.0483632	-0.281659
CRACR2B	0.0484457	0.379684
C1orf56	0.0485491	0.182777
PALM2-AKAP2	0.0485527	0.216182
MPZL3	0.048554	0.256658
USP46-AS1	0.0486725	0.707748
LOC101929819	0.0486779	0.279983
IGFL1	0.0486833	0.584561
AK024882	0.0487242	-0.255402
SPTBN1	0.0487243	-0.236117
AU159414	0.048728	-0.557608
THRB	0.0487788	0.548491
PEBP4	0.0487888	0.523268
43351	0.0488241	-0.491117
ADGRD1	0.0488478	0.593037
LTBP4	0.0488591	0.515864
PDLIM5	0.0490542	0.605964
AW967916	0.049096	-0.15558
RBM15B	0.0493018	0.156053
AW117206	0.0494391	-0.509131
SPINK7	0.0494544	0.596684
GSK3B	0.0494942	0.122855
T80844	0.0495279	0.324007
VPS18	0.0496052	0.186031
RNASET2	0.049621	-0.208485
IFT172	0.0496561	0.228131
LOC149351	0.0496601	0.808292
AI143909	0.0496661	-0.631209
WNT4	0.0497181	-0.224264
AV650380	0.0497282	0.422608
AA520982	0.0498337	0.404277
STRN	0.0498777	-0.106204
JHDM1D-AS1	0.0498902	0.185481
KBTBD8	0.0499616	0.182084
SCRN3	0.0499864	0.2475
