# Supplementary material for: Comparative Analysis of the Transcriptome of Latent Autoimmune Diabetes in Adult (LADA) Patients from Eastern China
Source: J Diabetes Res. 2019 Dec 14;2019:8616373. doi: 10.1155/2019/8616373 (PMC6948325; doi:10.1155/2019/8616373)
Supplement: Supplementary 6 — Table S6: DEGs between T2D and healthy patients. [file 8616373.f6.xlsx]

## Sheet: Sheet1
Gene symbol	P.Value	logFC
NFIC	5.37254e-07	-0.674903
NAALADL1	9.0096e-07	-0.604575
PROK2	3.49695e-06	1.53922
SART1	3.55897e-06	-0.557007
TMEM192	1.43064e-05	-0.713568
ANAPC4	1.43231e-05	0.417109
ALDOA	1.50058e-05	-0.822949
PNPLA8	1.53511e-05	0.398579
NAMPT	1.55785e-05	1.29659
PIK3CG	1.60647e-05	0.662179
JMJD1C	2.16594e-05	0.523209
GATAD2A	2.52577e-05	-0.519213
GIT2	2.80629e-05	0.516345
MIR4746	2.82742e-05	-0.604281
CARD6	3.05935e-05	0.841151
NRBF2	3.28778e-05	0.783397
NCOA7	3.46821e-05	0.468504
MTF1	3.60491e-05	0.630622
TRAPPC11	3.6965e-05	0.594423
DOCK11	3.74451e-05	0.450574
LOC90246	4.71011e-05	-1.27241
HIST1H4PS1	5.39044e-05	1.88428
AP5M1	5.6092e-05	0.427114
SLC35F1	7.19346e-05	-1.0946
BTLA	7.73579e-05	0.663277
WDR83	7.9698e-05	-0.605027
CCDC126	8.10526e-05	0.514605
ST6GALNAC4	8.61745e-05	-0.801321
ANKFY1	9.18546e-05	0.452527
AA504245	9.21776e-05	0.953971
PHF20L1	9.3377e-05	0.355805
PACS1	9.97663e-05	-0.634719
UBALD1	0.000101589	-1.39438
DDX6	0.000109484	-0.63073
GPR174	0.00011304	0.6899
MIR497HG	0.00012355	-1.5854
ZC3H13	0.000139894	0.830837
RNF146	0.000145096	0.556413
KANSL1	0.000146189	-0.426626
BNIP2	0.00015471	0.411551
SCAF4	0.000155163	-0.37667
LIX1L	0.000155592	-0.417641
DENND2D	0.000155831	0.750345
AI740938	0.000159595	-0.514391
AA683356	0.000160034	-1.62685
AW298167	0.000172648	-1.41909
MSL1	0.000173652	0.425549
RBBP6	0.00017529	-0.73251
ZNF83	0.000178931	-0.719003
GPD2	0.000184689	0.723023
MIR6883	0.000185511	-0.926186
CREB5	0.000188206	1.15557
CSTL1	0.000188557	-1.20032
JAK3	0.000188738	-0.539971
CBX4	0.000189115	-0.610746
KIF7	0.000191416	-0.629472
AI906424	0.00019627	-0.701951
SREK1IP1	0.000198561	0.443048
CHM	0.000205511	0.795352
GSKIP	0.000207749	0.680953
GFM2	0.000213327	0.35256
RPRD1A	0.00021876	0.391724
RAPH1	0.0002215	0.476762
LINC00324	0.000224373	0.772733
AU146384	0.000227009	1.24998
FUS	0.000227492	-0.753209
OTUD5	0.000242636	-0.374512
LOC101060363	0.00024945	-0.493911
PRKAB2	0.000259205	0.463497
HAPLN1	0.000260187	-0.912357
EGR1	0.000275499	2.00983
POLR1B	0.000276086	0.430532
PHF5A	0.000279449	-0.63845
GATC	0.000279913	-0.390319
C16orf72	0.000282461	0.359977
POLD3	0.00028434	-1.05971
TAF10	0.000284914	-0.451006
NARS	0.000296843	0.327335
AV760302	0.000302397	0.944453
XRN2	0.000305571	0.387559
MIR29C	0.000312195	0.575273
ME3	0.000321707	-1.18387
FNIP2	0.000326109	0.370236
ZNF81	0.000330808	0.379819
LOC285957	0.000330957	-0.560033
DPP9	0.000337262	-0.670617
LENG8	0.000359819	-0.565037
ALKBH5	0.000368081	-0.41656
DYNLL2	0.000371247	-0.443837
DEFB119	0.000381313	1.17024
AI912163	0.000382677	-1.2046
SCML1	0.000397203	0.621352
TMEM60	0.000399462	0.399205
CARD8-AS1	0.000411024	0.70745
CCBE1	0.000413596	-0.844448
C14orf119	0.000434818	0.762093
ATP6V0E1	0.000448201	0.691027
SUMF2	0.000457572	-0.522462
CCDC134	0.000459032	-0.347181
BE465277	0.000461849	0.412275
COTL1	0.000476656	-0.444452
C19orf43	0.000477245	-0.439367
PPP4R3B	0.000479376	0.381207
LINC00173	0.000484984	-0.715383
ALG5	0.000493489	0.681786
CCDC61	0.000527961	-0.833576
LRRC45	0.000556408	-1.44194
ZNF10	0.000558962	0.523752
MS4A4A	0.000571613	1.15396
F5	0.000572936	0.81747
CPLX2	0.000577052	-1.09571
N95440	0.000578046	-0.731444
SLFN11	0.000595315	0.662174
KCTD6	0.000618304	-0.520763
TTN-AS1	0.000618932	0.56624
AU158358	0.000639872	-0.594741
ALYREF	0.000641594	-0.637879
ALPK1	0.000641968	0.762882
POLK	0.000650198	0.457429
THAP9	0.000652263	0.471184
DTX3	0.000662826	-0.684092
AI078317	0.000664693	-1.00535
CYBA	0.000670164	-1.28494
AW629036	0.000672929	-1.49034
S100A7A	0.000674809	-0.826516
ZNF879	0.00068	0.439713
ZNF264	0.000704745	0.512584
AA885523	0.000709002	-1.49676
SCYL3	0.000714835	0.61813
SLC39A13	0.000716956	-0.381215
ALKBH7	0.000719915	-0.514694
ZNF398	0.000771425	0.462755
HNRNPD	0.000776488	-0.437412
IFIT2	0.000783644	0.774516
CD53	0.000795377	0.429733
FCHO2	0.000801088	0.696572
KIF1B	0.000802751	0.368945
TBC1D10A	0.000826468	-0.443965
TLR7	0.000839526	0.657347
AP1M1	0.000852158	-0.420825
TPR	0.000855218	0.493872
TBC1D23	0.000858147	0.393241
BE884916	0.000862457	-0.480548
MAP2K7	0.000882029	-0.414298
KMT5B	0.000890653	0.361767
R42281	0.00090054	-1.09936
N39230	0.000908823	1.05457
TRMT44	0.00091841	-1.10587
AK026199	0.000919387	-1.51048
NBPF26	0.0009277	0.410678
MRPS15	0.000942569	-0.330516
ANKHD1-EIF4EBP3	0.00094475	0.470643
STK17B	0.000951444	0.50797
TBC1D21	0.000952973	-0.795503
MIR6751	0.000954148	-0.403854
IER5L	0.00095596	-0.857243
AI492388	0.000958667	-0.702625
ASAP1	0.000960069	0.377026
AI139993	0.000971132	-0.519279
TMED4	0.000988792	-0.427985
SNHG16	0.00099097	-0.454192
TLR10	0.00101987	0.718266
MYNN	0.00102993	0.33001
AK022474	0.00103133	-0.821059
SPOPL	0.00103455	0.522881
AMMECR1L	0.00103626	0.44193
PSMA5	0.00104243	0.492826
UBQLN4	0.00104694	-0.400727
MED31	0.00106608	0.421187
BF110980	0.00108751	-1.43252
DEF6	0.00109681	-0.387305
NKAPP1	0.00109777	-1.04933
CEP152	0.00110823	0.393546
EEFSEC	0.00113079	-0.494842
SCARNA17	0.00114905	-0.472828
MAN2A1	0.0011572	0.336592
PPP2R2A	0.00115784	0.452332
ZNF226	0.00116543	0.701665
HIC1	0.00118148	-1.3327
TCEANC2	0.00118181	0.67792
KMT2D	0.00118973	-0.446934
AW975324	0.00119173	-1.11723
T81422	0.00120856	-1.20541
C1orf131	0.00121525	0.482724
LOC400927-CSNK1E	0.00121721	-0.318608
INO80B-WBP1	0.00122776	-0.797771
USF3	0.00126064	0.376313
ATP6	0.001282	-0.533671
AI205683	0.00129442	-0.698885
NSMF	0.0013162	-0.556348
PHACTR2-AS1	0.00131844	-1.28352
AA743565	0.00132907	0.989929
ZBTB4	0.00138617	-0.287564
RNA45S5	0.00144473	-0.719812
ERGIC1	0.00144985	-0.438027
CCDC78	0.00145852	-1.04787
PPWD1	0.00149661	-1.24731
HRCT1	0.0015487	-1.13481
BF514098	0.00155911	-1.78029
INSC	0.00157558	1.35603
KLHL12	0.00158539	0.308806
CFL1	0.00159222	-0.338621
ASH1L	0.001594	0.378228
EMSY	0.00159694	0.347628
STAG3L2	0.00161696	-0.632535
USP38	0.00161883	0.313702
MROH8	0.00162333	-0.942917
KIF3B	0.00162892	0.344213
PTPRS	0.0016525	-0.560882
ZBTB34	0.00167563	0.43009
SUDS3	0.00167856	-0.412739
CUL1	0.00168229	-0.830671
ABCB8	0.00169387	-0.387913
DCST2	0.00170034	-1.24701
CD84	0.00170226	0.345017
FAM122A	0.00172278	0.327884
IFNAR1	0.00173719	0.66167
RNF141	0.00174192	0.407707
SLC25A19	0.00177807	0.426228
LOC101928728	0.0018304	-0.595139
TLR8	0.00183172	0.599241
AW028622	0.00183567	1.10254
KLHL42	0.0018381	0.365944
GPR27	0.00185839	0.688533
MAFB	0.0018648	0.823774
AA322245	0.00187192	-1.05335
LOC100506639	0.00188057	-0.471952
CDYL2	0.00188228	0.44467
PQLC2L	0.00188419	-1.15207
ZMYM6	0.00189435	0.439699
GFM1	0.00191858	0.308128
PPP1R9B	0.00193621	-0.517761
ANTXR2	0.00196739	0.434629
BF433815	0.00201902	-1.47999
PPP1R18	0.00203288	-0.423169
AI425008	0.00204183	-0.390927
AI740629	0.00205537	0.877438
CXorf56	0.00209784	1.61476
MTMR10	0.00211871	0.343431
SSBP4	0.0022471	-0.343351
BF000203	0.00225066	1.48045
ZNF780A	0.00226789	0.713998
PGBD4	0.00227046	0.866793
EMC3-AS1	0.00227869	-0.605028
FAM187A	0.002304	-1.28378
DENND6B	0.00230901	-0.707019
NSUN6	0.00230938	-0.464315
T90760	0.0023107	-0.687494
AA863112	0.00231083	-0.585179
TOX2	0.00232879	-1.48534
AA021559	0.00234117	-0.999841
MRPL39	0.00236511	-1.70458
NAPB	0.00236897	-0.355232
SETD7	0.00237718	0.375784
AI380495	0.00238036	-0.540813
PPP1R3B	0.00240316	0.516957
GNAS	0.00240414	-0.43364
GUK1	0.00240933	-0.411675
ZNF559	0.00242434	0.471051
HNRNPM	0.00242467	-0.311331
SAMD9L	0.00242664	0.65616
AI250910	0.00243288	0.612103
PPP1R2	0.00244794	-0.48286
PPDPF	0.00246449	-0.501762
CHTF8	0.00246796	-0.351614
TMEM110-MUSTN1	0.00248582	-0.928693
ZUFSP	0.0024941	0.472847
AI569997	0.00250856	0.31247
RANBP2	0.00253413	0.448385
TMEM154	0.0025644	0.535863
PDK3	0.00257955	0.281791
ARHGAP36	0.0025832	0.887507
PIGS	0.00259364	-0.366034
VPS50	0.0026027	0.512702
SLC25A36	0.00261344	-0.498747
TMEM99	0.00265023	0.467277
JOSD2	0.0026519	-0.613686
GRK3	0.00265396	0.430001
ROPN1	0.00265717	-0.566295
COL25A1	0.00268326	-0.57935
BRD4	0.00269038	-0.261829
TAF1A-AS1	0.00270328	1.0738
CWF19L2	0.00272451	0.349814
STEAP4	0.00273017	0.754847
SNIP1	0.00273877	0.482059
DGKQ	0.00275573	-0.537116
GTPBP1	0.00277454	-1.11584
BF055382	0.00279651	1.17514
SUCNR1	0.00280867	1.1226
AI613089	0.00280908	-0.747476
HCST	0.00285022	-0.450502
ZNF420	0.00285084	0.422563
CMTM2	0.00285665	0.982839
AW451980	0.00287268	-0.41041
AA603494	0.00289983	-0.674447
TMC8	0.00293545	-0.415328
CLIP4	0.00295365	0.442293
MTO1	0.00299774	0.363542
MEI1	0.00300529	-0.375457
ZCCHC10	0.00303559	0.382947
AW969703	0.0030544	0.758081
DNAJC4	0.00310716	-0.274284
AI651638	0.00311835	-1.2858
HAPLN3	0.00312599	-0.521418
AI018729	0.00314829	-1.0566
PHLDA1	0.00316245	0.918132
CNST	0.00327708	0.373486
BE905157	0.00331488	-0.334315
C15orf65	0.00333407	1.34819
PDXP	0.00334474	-0.413373
MOB3B	0.00338314	0.508595
ZNF470	0.00340017	0.455529
C5orf63	0.00342835	0.39534
TRAPPC1	0.00344592	-0.418135
DHX8	0.00344997	0.247062
FLVCR1	0.00346713	0.426614
NRDC	0.00349022	0.609715
RAB10	0.00349073	0.52031
LMBRD2	0.00349313	0.346746
SFT2D1	0.00351084	0.341827
MPND	0.00352122	-0.510905
NECAP2	0.00354081	-0.464083
LINC00852	0.00355776	-0.518699
U2SURP	0.0035821	-0.532214
AA935659	0.00359025	-0.62549
NFXL1	0.00359738	0.651024
ZDHHC5	0.00361085	-0.356889
ARMC12	0.00364317	1.07137
APH1B	0.00366214	0.358958
LINC00644	0.00369653	-1.67087
CCDC82	0.0037246	0.337092
GABPB1-AS1	0.00372547	-0.487412
MXD1	0.00372727	0.61053
AW968636	0.00377147	-1.23248
RABEP1	0.00377896	0.335834
LOC101928615	0.00382666	0.435357
PTCD3	0.0038986	0.387664
U2AF2	0.00390424	-1.05902
NSMCE2	0.00391033	0.268319
SLC12A6	0.00391927	0.231736
UBE2W	0.00393908	0.361445
ATP6V1G2-DDX39B	0.00403882	-0.302398
FAM126A	0.00405174	0.395604
NSMCE3	0.00407095	-0.354278
TLR9	0.00407618	-0.54646
LDB2	0.00410998	-0.847395
AK022112	0.00412158	-0.72745
BE467260	0.00412469	1.05183
TET3	0.00412517	-0.377568
GAB1	0.00412633	0.407672
UGP2	0.0041303	0.527563
SPOP	0.00414111	0.470763
NEMP2	0.00415547	-0.894916
CDH19	0.00417001	-0.960236
LOC643072	0.00419009	0.685986
AIMP1	0.00419986	-0.358978
TSPAN32	0.00420104	-0.399062
BTBD10	0.00423275	0.384444
FAM63A	0.0042357	-0.446213
FNDC10	0.00425265	-0.382375
OPRK1	0.00425424	1.15202
LOC101929612	0.00426327	-0.526644
RBPJ	0.00429326	0.473843
DPH3	0.00430172	0.33023
DYNC1H1	0.00432601	-0.36444
ARHGAP9	0.00432624	-0.350966
PIM3	0.00435535	-0.632264
MIR6837	0.00436223	-0.427707
AMN1	0.00438839	0.449608
SLC35F5	0.00438916	0.398464
HMGB4	0.00440792	-1.13495
EXOC6B	0.00443811	0.469841
AW016812	0.00446181	1.01387
LINC01578	0.0044724	-0.509646
AI949690	0.00448613	-0.475146
SBK1	0.00450031	-0.500156
PIK3AP1	0.0045519	0.441003
ZNF562	0.00455226	1.22795
FLYWCH2	0.00457016	-1.20089
GNG8	0.00463127	-1.21853
AW664903	0.00464641	0.665272
TAGAP	0.00464864	0.325163
LYPLAL1	0.00468302	0.30218
VN1R3	0.00470619	-1.47144
PGP	0.00477642	-0.448724
BID	0.00479475	0.348802
NADSYN1	0.00481449	-0.36708
ERH	0.00481452	-0.330007
NAA25	0.00482143	0.28153
NUDT16P1	0.00482719	-0.492994
BF676361	0.00483814	0.532832
DNAJC14	0.00487257	-0.345693
AI743261	0.00488141	-1.00055
WDR37	0.00492346	0.653816
DPP7	0.00492542	-0.334635
WRNIP1	0.00493786	-0.230455
CR1L	0.00496874	0.482559
FAM76A	0.00500484	-0.449507
SNX14	0.00501798	0.299459
AI962305	0.00502248	0.842013
AI740774	0.00503002	1.07452
FKBP3	0.00503052	-0.761013
TIMM21	0.00503535	0.417572
AI681868	0.00504304	0.778102
HES4	0.00505108	-1.13341
FOXK1	0.00507282	-0.320117
FOPNL	0.00509647	0.323668
43354	0.00514033	0.972951
PWWP2A	0.00517447	0.261439
GARNL3	0.00518704	0.783505
TLR6	0.00520854	0.919453
BF431867	0.00523189	-0.6342
PPIL1	0.00527977	0.658149
AW135003	0.00532168	0.549602
T79640	0.00532646	0.597367
SCAMP2	0.00537228	-0.373053
KIF5B	0.00539115	0.210213
CCDC174	0.00540631	0.302337
LINC01015	0.00542346	-1.1486
POC5	0.00545472	0.315225
AF116671	0.0054994	0.596289
CLOCK	0.0055196	0.291021
RBM39	0.00553366	-0.510923
AL080208	0.00554537	-0.462743
B2M	0.00558201	-0.602617
MRVI1	0.00558662	0.582526
SUZ12P1	0.00560576	0.726064
NF2	0.00562037	-0.41794
AA406227	0.00564105	0.917399
AW969652	0.00566999	-0.843481
NFAT5	0.00569978	0.296149
AW444897	0.00570027	0.845506
BTBD6	0.00570912	-0.289793
AK021594	0.00571174	-0.707481
ASB1	0.00572652	-0.460417
CDAN1	0.00572796	-0.356104
PBRM1	0.0057742	0.279482
PIGM	0.00578563	0.312515
ZBTB38	0.00588399	0.385354
AA424811	0.00588646	-0.726169
AW291100	0.00594253	-1.00589
XPO5	0.00597283	0.429808
SMIM24	0.00597859	-0.546845
AI291804	0.00598295	-1.27203
UBALD2	0.00599344	-0.475694
CMTM3	0.00603373	-0.333853
LOC101928718	0.00606762	0.636821
TMEM189-UBE2V1	0.00607313	-0.379506
BF223804	0.00607927	-1.03289
GNG2	0.00609789	-0.334796
NAPRT1	0.00612721	0.579182
PEAK1	0.00613478	0.536141
SAE1	0.00613489	1.10052
ATG9B	0.00613956	-0.412864
PDLIM2	0.00615498	-1.05224
LSM8	0.00616187	0.360821
N29877	0.00617569	-0.684553
ZNF343	0.00617571	0.422349
MIDN	0.00617841	-0.434046
MMP24-AS1	0.00617917	-0.380687
AW467471	0.00618325	-0.66898
SDAD1	0.00618749	0.4732
CWC15	0.00621055	-0.277574
ZNF626	0.00623346	0.489312
ANKRD18B	0.00623657	0.910347
HTR2A	0.00628214	-1.20895
AV698915	0.00630254	0.991836
LOC101928943	0.00630606	-1.06356
T97717	0.00631879	-0.487622
MPI	0.00632791	0.693209
LINC01420	0.00636573	-0.288171
SAMD13	0.00646232	-0.526271
LRP2	0.0065021	1.04493
DENND6A	0.00650536	-0.346632
AW978811	0.00655024	-0.565544
MCEMP1	0.00659338	0.781513
AI805550	0.00668078	1.05399
GPR150	0.00668196	0.830077
RAB27B	0.00671518	0.509887
BE327666	0.00672883	1.25136
IGIP	0.00672939	0.481971
KIAA1429	0.00679685	0.292959
PAG1	0.0068014	0.328068
DHFR2	0.00682026	0.480897
TMEM71	0.00684121	0.449797
CCDC102B	0.00687417	-1.40708
LOC100996412	0.00687683	0.431114
PSMG3	0.00691402	-0.281276
KLHL7	0.00692674	0.373479
AV700865	0.00703562	1.09805
AKAP10	0.00704528	0.457868
CDK9	0.00705277	-0.473505
VKORC1L1	0.00705687	0.601934
AA805082	0.00709791	1.1087
43160	0.00712804	0.489947
LVRN	0.00716155	-1.29034
FAM120B	0.00718217	0.434647
CAMTA1	0.00723445	-0.284736
MRPL35	0.00729008	0.440471
LINC00658	0.00729943	0.791047
W87939	0.00730689	-1.05705
TMED8	0.00730985	0.261735
FKBP11	0.00734376	-0.572263
SLC40A1	0.00735143	0.453874
ATP6V1D	0.0074163	1.22909
C1orf168	0.00742259	-0.993323
LOC729296	0.00743854	0.872593
RUFY3	0.00744933	-0.350031
AK026267	0.0074981	1.0043
AP3M1	0.0075177	0.22916
AI064690	0.00753703	0.875377
AU145144	0.00754114	-0.376877
CYP2R1	0.00755028	0.337435
INIP	0.00755611	0.291502
AW576448	0.00758259	-1.17444
KIAA1211L	0.00761254	0.828885
TMEM245	0.00763149	0.267642
CFDP1	0.00765749	-0.492077
KANSL1-AS1	0.00766261	-0.553467
ZNF438	0.007665	0.458906
ZNF319	0.00766706	0.429395
CGGBP1	0.00768115	0.244025
FAM110A	0.007753	-0.393552
AK024935	0.00776188	-0.638094
CCDC58	0.00782039	-0.571172
LYSMD3	0.00782686	0.611269
AF274934	0.00785754	1.76598
IRF2BP2	0.00786044	-0.256469
AA826931	0.0078868	-1.16809
AW162768	0.00793175	0.558745
AW979196	0.00796964	-1.18381
BF432461	0.00798085	1.09384
AI279296	0.00800965	0.84636
CUL9	0.00804225	-0.354642
GBP4	0.0080493	-0.410801
RPAP2	0.00817061	0.361119
COG6	0.00820715	0.362779
C8orf34	0.0082398	1.32974
MAPRE3	0.00827008	-0.75694
SPNS1	0.00828176	-0.463418
MCTP1	0.00828276	0.686664
TNFRSF10C	0.00829152	0.947931
DAP3	0.00830159	-0.277304
GABPB2	0.00834503	-0.372967
GTF2H2B	0.0084264	-0.443693
NBPF10	0.00845316	0.371996
AW291545	0.00848432	0.587113
YPEL3	0.00850291	-0.404817
RORC	0.00850629	1.17033
PCNX1	0.00857333	0.32978
VCPKMT	0.00857371	-0.425167
AA706922	0.00859389	0.612767
LOC100507616	0.00859703	0.949554
PSMG4	0.00861356	-0.387018
FKSG29	0.00864838	0.985956
MANEA	0.00866474	0.426944
FBLL1	0.00872095	-0.779811
DCLRE1C	0.0087301	0.402636
RNF126	0.00873616	-0.420929
INO80E	0.00875571	-0.391659
SORL1	0.0087605	0.435423
BF514885	0.00876445	-0.593137
AI424238	0.00876676	0.602222
ATXN7L3	0.00878903	-0.456977
SEPT7-AS1	0.00884578	0.43626
BF436900	0.00884776	-0.451764
LMF1	0.00885318	-0.396469
TMEM200A	0.00886636	0.873865
AA019363	0.00889206	1.50571
ATP5J2-PTCD1	0.00889909	-0.474511
SPAG9	0.00890675	0.27181
OXR1	0.00895706	0.354059
AW665733	0.00914699	-0.774329
AK025673	0.00915723	1.4047
AF339768	0.00918172	0.565684
NAA30	0.00918868	0.304993
AW183782	0.00919795	-0.634884
ARMC1	0.00922947	0.300946
LOC100129034	0.00925875	0.335754
CACNB4	0.0092901	1.07663
TMEM260	0.0092942	0.463274
NONO	0.00937521	-0.215364
IFT43	0.00938603	0.358143
FOXP4	0.00939803	-0.498647
ZIC2	0.00942926	-1.14182
AW290978	0.00943372	-0.467815
TLR4	0.00943827	0.547912
SNHG22	0.0094843	0.396202
AK022204	0.00948848	-0.629453
UQCC3	0.00951842	-0.316778
CUL4A	0.00956475	-0.461973
IL17RB	0.00957358	0.745001
EXOC6	0.00960762	0.287592
HSPD1	0.00962787	-0.463801
UBR1	0.00964098	0.306123
FAM118B	0.00967362	0.36643
BF197705	0.00971921	1.09148
FBXO30	0.0097441	0.559683
KIAA1958	0.00976182	0.6218
GIMAP6	0.00976917	0.381742
NRROS	0.00977924	-0.684701
FOXP1-IT1	0.00980896	0.501596
AI018561	0.00981189	-0.625019
C17orf80	0.00983418	0.31936
MBTPS2	0.00991457	0.394791
SCYL1	0.0099334	-0.51284
ARPC5L	0.00994189	-0.297125
SSBP3	0.00999648	-0.38724
CYBRD1	0.0100261	0.777905
LOC101928464	0.0100298	-0.439442
AK023865	0.0100363	0.886205
TMEM70	0.0100605	0.353548
NUMB	0.0100612	0.526338
RTKN	0.0100675	-0.494552
AI949772	0.010072	0.609414
FUT8-AS1	0.0100832	-0.307816
PKHD1L1	0.0100855	1.32873
TBX3	0.0100871	-0.468702
PAFAH1B2	0.0101173	0.346473
FBXO45	0.0101496	0.32318
ARID1B	0.0101804	-0.251898
MYT1L	0.0101991	-1.07561
SEC62	0.0102222	0.313995
CDC37L1	0.0102243	0.539432
MAP3K1	0.010238	0.302396
ZSCAN16-AS1	0.0102692	-0.408191
G3BP1	0.010274	0.211964
LOC101926887	0.0103428	-0.964675
MBNL3	0.0103565	0.378644
RBMXL1	0.0104015	-0.586492
SNHG10	0.0104587	-1.21624
LINC00926	0.0104687	0.699769
EVX1	0.0105232	0.501014
AV699953	0.0105358	-0.430818
SLC2A4RG	0.0106086	-0.341153
AK3	0.0106275	0.355075
AA825563	0.0106328	0.58292
KIAA1683	0.0106339	-0.436179
LOC440173	0.0106639	-1.00708
CCDC107	0.0106887	-0.404526
SDHAF2	0.0106956	0.268783
ZNF440	0.0107235	0.366081
MCPH1	0.0107897	0.385768
MRRF	0.0108055	0.428751
NLRC3	0.0108119	0.423473
C19orf33	0.0108288	-1.18376
ELP3	0.010883	0.292461
ZCCHC9	0.0109228	0.493827
BAHCC1	0.010925	-1.0673
RBAK	0.0109575	0.28236
PROM2	0.0110383	-0.469456
AI074467	0.0110914	0.749174
GEMIN5	0.0111505	0.664709
KLHL8	0.0111515	0.273303
BE857611	0.0111567	-0.563818
AV647829	0.0111718	-0.461853
BF197708	0.0112139	0.563406
ZYG11B	0.0112521	0.24468
ATP2B3	0.0113358	-1.03144
MSANTD4	0.0113369	0.35543
OSBPL5	0.0113773	-0.428868
DDX56	0.011428	-0.407796
AI681763	0.0115141	-0.40859
BF509125	0.0115604	-0.610489
BACE2	0.011603	0.39704
HBP1	0.0116553	-0.735374
MPZL3	0.0117282	0.444769
PPM1L	0.0117453	0.368006
AW295037	0.0118252	-0.481257
CR1	0.0118276	0.46889
AW291332	0.0118342	0.373589
AW015588	0.0118544	0.447132
KCNK4	0.0118609	-0.516397
LOC100506282	0.0118642	0.49856
AK026434	0.0118747	-0.865314
GABRR3	0.0119021	-1.01741
MIR6836	0.0119106	-0.689205
C19orf25	0.0119574	-0.30705
LOC100505622	0.011962	0.65312
DLGAP4	0.0119651	-0.394855
AK021812	0.0119712	0.444606
RGS6	0.0120186	-0.424462
TBCK	0.0120201	0.432858
R51383	0.0121331	0.976236
AL360204	0.0122193	0.995005
DCAF8	0.0122456	-0.296649
AI963959	0.0122478	-0.990023
ENSA	0.0122963	-0.389722
LOC399900	0.0123059	-0.743956
PHAX	0.0123086	0.368243
TMEM141	0.0123102	-0.584218
ARHGAP26	0.0123299	0.405419
AI379514	0.0123616	-0.707348
ARHGEF7	0.0124437	-0.371491
CNOT11	0.0125013	-0.20594
HVCN1	0.0125163	0.409655
HOTS	0.0125567	-0.748219
MYBBP1A	0.0126265	-1.21059
DHRS9	0.0126808	0.527018
AK025534	0.0127606	0.454589
AI733506	0.0127669	-0.519512
MAPK15	0.0127756	-0.639688
FGF12	0.0127918	0.966209
C16orf82	0.0128095	-1.07339
GET4	0.0128634	-0.36189
CMPK1	0.0129303	-0.291203
ABHD14B	0.0129463	-0.342388
ODF3	0.0129602	0.831733
HEATR5B	0.0129832	0.263799
TPGS1	0.0129964	-0.878255
BE041583	0.0130574	-1.14561
ZNF227	0.0130843	0.397757
ATG2B	0.0130986	0.320518
BF055156	0.0131013	1.33306
BE219151	0.0131518	1.08384
SPIDR	0.0131967	0.497837
AK023907	0.0132362	-0.493968
ATP8B2	0.0133057	-0.542861
PLD5	0.0133184	-1.37072
LYPD4	0.0133755	1.016
AI939632	0.0134099	-0.628498
EP400NL	0.0134418	-0.383166
NBPF20	0.0134615	0.353188
RALGAPA2	0.0134879	0.248881
AA404260	0.0134885	0.256626
GPHN	0.013494	0.355513
BRPF3	0.0135178	0.340033
DLL1	0.0136117	-0.832591
FAM159A	0.013701	-0.593013
CCDC113	0.0137455	1.40541
CISH	0.0137658	0.561578
MRPS18C	0.013963	0.362438
R39769	0.0139736	-0.998816
RNF135	0.0139878	-0.390121
AL119491	0.0140076	-0.511421
AI248622	0.0140187	-0.913915
RSPH4A	0.0140589	-1.14156
AU147903	0.0140837	-0.722979
ST8SIA4	0.0141043	0.542909
DYNLRB2	0.0141366	0.647118
AA195014	0.0141723	-0.878191
AW452419	0.014195	0.67169
CEP19	0.0142892	0.636593
AW450171	0.0142912	-0.820958
SLC25A28	0.0143384	-0.314731
PHLDB3	0.0143651	-0.662319
EP400	0.0143904	-0.66096
AI732903	0.014397	-0.336201
CLUH	0.0144373	0.545001
UBE3A	0.0144644	-0.551813
CDCA5	0.0144875	-1.19749
FAM210B	0.0145468	0.272883
CNIH4	0.014628	0.336031
KLF3	0.014646	0.250164
UBA2	0.0147028	0.412864
BF508641	0.0147869	1.1135
ZNF2	0.0148108	0.325353
GNAO1	0.0148324	-0.922805
AA650017	0.0148397	0.90787
MIB1	0.0148631	0.337378
FAR1	0.0148698	0.278882
UBIAD1	0.014874	0.266223
THAP4	0.0149535	-0.374794
SNCA	0.0149561	1.15763
ZZZ3	0.0149596	0.245365
AI090764	0.0149725	-0.681559
FAM19A1	0.0150614	0.945353
DERL1	0.0150641	0.228417
R33735	0.0152532	0.550711
LAMP2	0.0153478	0.402072
SOWAHC	0.0153956	0.693755
GOLGA2P5	0.0153983	0.386646
BCR	0.0154037	-0.319904
AI887749	0.0154223	1.16885
AL038704	0.0154613	0.400589
SNX16	0.0154668	0.456382
AQR	0.0154824	0.379468
AV687517	0.0154884	0.549046
FOXD3	0.0155341	0.580269
LINC00851	0.0155631	-0.727344
AI802997	0.0155682	0.394827
EXOC2	0.0157728	0.323185
TRAF7	0.0157895	-0.348251
SLC22A16	0.0158081	0.481233
KIAA2013	0.0158351	-0.317263
CEP83	0.0158405	1.19622
AW628735	0.0158704	0.652313
AI769647	0.0159329	-1.32128
NKD1	0.0159592	0.398271
AW135360	0.015967	-0.944694
SHPRH	0.0160079	0.373861
TRPM3	0.0160429	-0.551834
TXLNG	0.0160847	0.332259
AW953952	0.0160898	-0.241783
RSU1	0.0161707	-0.508399
AP4S1	0.0161988	-0.288839
IWS1	0.0162087	0.269943
STUB1	0.0162133	-0.284707
LOC101928524	0.0162289	0.585098
LIN7B	0.0162509	-0.460451
AA292747	0.0162717	1.0067
GRASP	0.0163061	-0.934569
SELO	0.0163536	-0.320588
NDC1	0.0163639	0.275734
T83652	0.0164064	-1.10551
NR2C2	0.0164498	0.312103
ZBP1	0.0165398	-0.736936
SLC35F6	0.0165445	-0.338256
DSCAM	0.0165811	0.564344
LRG1	0.0165964	0.527481
KCNRG	0.0166337	-0.474602
AI344345	0.0166358	0.388545
ITPKB	0.0166841	-0.394389
PDK4	0.0166994	1.05383
LOC147791	0.0167432	0.610042
DOT1L	0.0168065	-0.389633
MAPK9	0.0168186	0.303151
BE503728	0.0168366	-0.700081
DCAF6	0.0169186	0.314777
ZNF397	0.016944	0.356868
FAM104A	0.0169571	0.250405
FANCM	0.016987	0.367258
PHRF1	0.0169873	-0.419291
AI932618	0.0170176	0.423422
TMEM43	0.0170207	0.288004
PRR29	0.0170242	-0.31734
AW166847	0.0170966	0.597933
ZCCHC6	0.017259	0.266851
TMTC3	0.017263	0.290302
T71269	0.0174324	1.20265
LINC00467	0.0174861	-0.546546
LRRC69	0.0175063	0.80882
WARS2	0.0175462	0.425582
AGPAT5	0.0176116	0.422454
HNRNPA1P10	0.0176747	-0.19689
BE670987	0.0176966	-0.973429
SNX13	0.0177334	0.302459
MIR4458	0.0177369	0.825675
ROCK1	0.0177517	-0.517315
UBA6	0.0177669	0.228727
B3GNT5	0.0178009	0.559676
KLF6	0.017817	0.342273
SYNRG	0.0178306	0.30559
R88990	0.0178349	-1.04552
LOC100505797	0.0178474	-0.875368
TPD52	0.0179179	0.692291
ACAP3	0.0179966	-0.329098
WNT16	0.0181449	1.27249
CMBL	0.0182548	-0.396964
C10orf88	0.0182729	0.390255
ADAMTS15	0.0182889	1.02428
CCDC90B	0.018333	0.738655
MFSD8	0.0184343	0.256705
ZNF180	0.0184705	0.958074
GEMIN6	0.0184716	0.289795
UBQLN1	0.0184844	-0.206574
SART3	0.0185206	0.296687
CHCHD7	0.0185657	0.241698
DHX40	0.0185956	0.2678
GRIN3A	0.0187142	-0.694346
DCAF13	0.0187615	0.311846
RNF24	0.018797	0.355619
WDR61	0.0188542	0.415679
NCBP2-AS2	0.0189119	-0.393985
AA810156	0.01893	-0.712236
CNTD1	0.0189534	-0.790064
AKT2	0.0189663	-0.277893
AI806781	0.0189805	0.56542
AI191905	0.0189887	-1.00632
CENPU	0.0190127	-0.32585
SNAPC3	0.0190609	0.43312
GPRIN3	0.0190993	0.326801
AA778783	0.0191581	-1.34204
WHAMM	0.0191818	-0.510606
WDR92	0.0192225	0.434251
BE858984	0.0192898	-0.67946
AURKAIP1	0.0193012	-0.244028
UBE3C	0.0193868	-0.944627
AV645438	0.0193966	0.804386
CBWD7	0.0194659	0.315877
MREG	0.0194991	0.337058
YIF1B	0.0195006	-0.401787
AI927309	0.0195634	0.721197
ALDH16A1	0.0195992	-0.504103
AF124368	0.0196557	-0.656918
CRACR2A	0.0196954	0.210563
SFMBT2	0.0197145	0.399465
EBF1	0.0197861	0.518713
TAF8	0.0199134	-0.329447
UBE2D3	0.0199653	-0.261208
HMX2	0.0199779	-0.641748
LINC00174	0.019981	0.380515
TRIM8	0.020107	-0.254627
TOM1L1	0.0201384	-1.05034
ZDHHC23	0.0201404	0.365792
AI733642	0.0201497	1.08744
ADAMTS8	0.0201909	0.771991
LOC102723600	0.0202052	0.891839
POM121L10P	0.0202088	-0.420896
UFL1	0.0202118	-1.09939
HORMAD1	0.02023	0.928037
PAPOLG	0.0202364	0.255927
FLVCR1-AS1	0.0202877	-0.595118
AW090199	0.0202938	-1.28989
BF114768	0.0203476	-0.445363
VPS33A	0.0203719	0.282831
MTMR3	0.0203744	-0.24581
SH2D5	0.0204361	-0.854751
LYSMD2	0.0204761	0.299958
LOC285095	0.0205242	-0.781102
LOC100996424	0.0205274	-0.362593
ORMDL3	0.0205539	-0.480383
MCMBP	0.0205591	0.296074
IQCF6	0.0205598	-0.40631
DSCAML1	0.0206002	-0.516707
RHBDD2	0.0206391	-0.340524
AW028687	0.0206898	0.850732
AA724992	0.0206902	0.803461
BF938956	0.020701	0.44127
LOC101243545	0.0207147	0.483898
NAA50	0.0207807	0.359831
BF511339	0.0208638	0.738512
PHF8	0.0208666	-0.463241
BE219874	0.0208774	-0.719898
IPO11-LRRC70	0.0209157	0.465727
ARL14EP	0.0209244	0.292575
DDAH1	0.020928	-0.834365
LOC100653296	0.0209695	1.09385
AW137997	0.0209819	1.286
AI732275	0.0209898	0.91413
IYD	0.0210072	1.09331
TRPM6	0.0210588	0.530235
T71554	0.021084	0.859986
MMP8	0.0211134	1.25577
TES	0.0211174	0.912513
AU155234	0.021161	0.404767
LINC00667	0.0211925	0.272174
SNORA17B	0.0213148	-0.360233
BDP1	0.0213473	0.294572
PARD6B	0.0213691	1.13044
GPR75-ASB3	0.021377	0.235067
TBC1D8B	0.0213929	-1.35542
AHI1	0.0214045	-0.786457
TEX37	0.021477	-0.388535
MTMR6	0.0215326	-0.548332
FAM174A	0.0215945	0.405614
SDF4	0.0218229	-0.249082
SYT12	0.0218384	-0.66512
MLX	0.0218536	0.449242
MRPL41	0.0218592	-0.248871
RGMB	0.0218791	0.309614
TMEM168	0.0219015	0.649122
LOC100128644	0.0219017	-0.628098
MKNK1	0.0219461	0.355507
VTA1	0.0219548	0.246857
RBM18	0.0219784	0.29016
MTMR9LP	0.0219893	0.732197
DOCK8	0.0220006	0.247934
HIPK3	0.0220149	0.233156
PRELID1	0.0220702	-0.270378
AI928355	0.0221183	0.354535
TPM1	0.022147	-0.709075
BCL6	0.0221639	0.606153
FAM205A	0.0221851	0.709576
RARS2	0.0222158	0.193304
FANK1	0.0222361	0.694925
NAF1	0.0222487	-0.410286
LOC101060521	0.0222859	-0.373967
AU146087	0.0223136	-0.935848
AA504649	0.0223196	0.591824
DNAJC19	0.022322	0.234675
LINC00621	0.0223604	0.205962
WSCD2	0.022385	0.761533
GLIPR1	0.022401	0.390179
NCKAP5L	0.0224061	-0.517261
UBFD1	0.022422	-0.215847
ANKRD20A4	0.0224626	-1.19607
ENPP5	0.022536	0.653596
TPRG1	0.0226703	0.965141
C9orf135-AS1	0.0227204	0.868358
CD274	0.0227242	0.241809
MIR21	0.0227303	0.530508
R43896	0.0227621	-1.01683
TMED2	0.0227979	-0.254809
BF510521	0.0228169	-0.934268
DENND4C	0.0228253	0.268408
DGAT2	0.0228477	0.450504
AA688275	0.0228576	-1.08225
AK026466	0.0228993	-0.595495
AK027107	0.022929	0.443841
LOC100130452	0.0229372	-0.654134
AU150817	0.0229746	-0.920928
TTC39C	0.0230313	-0.286786
S100A10	0.0231171	0.492673
ZDHHC8	0.0231858	-0.269056
AI671540	0.0232062	0.917474
ERI1	0.0232107	0.266941
ENHO	0.0232453	-0.389291
RSPRY1	0.0232601	0.228689
FLJ16734	0.0232737	-0.43285
AK022037	0.0232863	-0.856068
AK022266	0.0232945	0.465783
ZNF708	0.0232949	-0.473774
AI074450	0.0233291	-0.381806
POLDIP3	0.023397	-0.331978
LNX1	0.0234006	0.488785
BE327552	0.0234096	-0.997558
AI252004	0.0234262	-0.364638
T97301	0.0234275	1.00302
NIPAL4	0.0235395	-0.762865
UBE4B	0.0235902	0.881235
TMCC3	0.0236489	0.336939
BF111072	0.0236935	0.595623
SASH1	0.0236985	0.524713
C12orf56	0.0237147	0.819049
MYADML2	0.0237484	-0.808329
AU145361	0.0237973	-0.603143
CRBN	0.0238292	0.261895
SOX9-AS1	0.0238538	0.879104
RNF26	0.0238829	-0.310254
AI219891	0.0239505	-0.717789
RPL37	0.023952	-0.184812
AW749121	0.0239715	-0.856316
PPIA	0.0239773	-0.696613
RAVER1	0.0240042	-0.484494
MAP4	0.0240613	-0.449495
WHAMMP2	0.0240619	-0.792721
TAOK1	0.0240838	0.309588
PHYKPL	0.0241023	-0.220023
BF514004	0.0241054	0.740544
LOC101929229	0.0242074	-0.657004
WIPF1	0.0243881	-0.496046
AW086205	0.0243985	0.796909
PRPF40A	0.0244019	0.214676
COPG2	0.02446	-0.694589
COMMD2	0.0244722	0.265775
MS4A1	0.0244969	0.396269
MCL1	0.0245016	1.16509
HEATR1	0.0246639	0.328308
CFAP61	0.0246946	-0.588126
RNF115	0.0247801	-0.270972
FXYD5	0.0248013	-0.375197
GALNT7	0.0248061	0.32707
GPATCH2L	0.0248783	0.202368
ZNF865	0.0248973	-0.494956
AA651631	0.0249182	-0.45274
AI343519	0.0249243	-0.716383
TSPAN11	0.0249341	-0.702752
TRPM5	0.024982	-0.832626
H98180	0.0250052	0.602593
LFNG	0.0250297	0.561971
CYP2U1	0.0250784	0.216674
C14orf80	0.0251369	-0.744638
AI017540	0.0252148	-0.974416
NDUFB4	0.0252909	-0.554109
SMARCAD1	0.0253028	0.285181
CAPN10-AS1	0.0253747	-0.854492
TNFRSF19	0.0253774	-0.457736
ZMIZ2	0.0254368	0.531551
AI821399	0.0254391	-0.422224
SELK	0.0254473	0.243588
DSCR9	0.0254996	0.669989
PPIL4	0.02557	-0.338019
AW271460	0.0255859	0.339326
HES7	0.0256203	-0.621413
CSRNP2	0.0256367	0.526889
TRAPPC6B	0.0256509	0.348458
H93721	0.0257223	0.512888
W90010	0.0257795	-0.575482
BMT2	0.0258038	0.33819
AK021952	0.0258429	-1.02515
W68845	0.0258487	-0.268145
BICDL1	0.0258584	-0.654722
CPSF6	0.0258656	-0.440452
MAP9	0.0258728	0.273885
TNIK	0.0258975	-0.691503
ZNF670	0.0259402	1.14012
R37337	0.0259916	0.354428
LOC101929774	0.0259961	-0.876569
TEX13A	0.0259968	-0.742081
FAM99B	0.0260066	0.688881
ZBTB10	0.0260524	-0.323834
NTRK2	0.0260653	-0.607553
FAM173B	0.0260817	0.428806
GNPDA2	0.0261361	0.313
NBEAL1	0.0261416	0.149116
VASH2	0.0262895	1.23588
PLD4	0.0263321	-0.446113
AL137313	0.0263476	-1.02685
TATDN3	0.0263735	0.346035
SPATA18	0.0264047	0.526149
AU159414	0.0264103	-0.81394
NMRAL1	0.0264213	-0.294183
MUC4	0.026463	-0.376322
HSPA9	0.0265216	-0.769416
CTBP1-AS2	0.0266204	-0.386318
OR52K3P	0.0266957	0.784158
RBBP8NL	0.0267027	0.572217
RAPGEF2	0.0267132	1.04994
ITPR1	0.0267143	0.527455
THNSL1	0.0267183	0.3658
GPR34	0.0267556	0.489461
COQ3	0.026772	0.463017
RUNDC3B	0.0267956	1.08252
MBLAC2	0.026798	0.39124
CDKN2B	0.0268716	0.915582
DUSP16	0.0269045	0.399342
CENPV	0.0270318	-0.366512
KDM4B	0.0270321	0.34379
SCOC	0.0270579	0.30662
AK025047	0.0271094	-0.35432
HAUS6	0.0271254	0.265045
SQSTM1	0.0271412	-0.370174
BBX	0.0272101	0.205494
AA642418	0.0272221	0.462997
AP4B1	0.0273308	0.234017
AF210650	0.0273383	-0.862589
AW972669	0.0273503	-0.486014
VPS37A	0.0273518	0.225792
AI057239	0.0273626	0.966717
PURB	0.0273746	-1.01467
HINT1	0.0274299	-0.208745
BF435861	0.0275575	-1.05294
METTL25	0.0276316	0.652191
MTRF1	0.0276712	-0.367061
MRLN	0.0277288	-0.609378
TOMM22	0.0277353	-0.388743
PCBP1-AS1	0.0277542	-0.229813
AV741679	0.0277635	-0.57897
PEX2	0.0277729	0.278645
AA905214	0.0277757	1.01189
AI697714	0.0277961	-1.008
AA835983	0.0278382	-1.07069
SLC26A9	0.0278707	-0.792958
AA861773	0.0280201	-0.385973
AP2A1	0.0280559	-0.383017
ZNF30	0.0281207	0.3752
PRKACB	0.0281532	-0.388746
ANKRD54	0.0283317	-0.33631
AU144590	0.0283486	0.98116
AI821085	0.0283634	0.522552
MEDAG	0.0283727	-0.757774
MCRIP1	0.0283739	-0.589283
PPP1R35	0.0283776	-0.244654
SMIM10	0.0284334	-1.08545
RGAG4	0.0285048	0.664036
C9orf173-AS1	0.0285416	0.405697
RSBN1L	0.0285957	0.329041
GTF2H3	0.0286043	-0.357265
SCYL2	0.0286253	0.272107
C16orf87	0.0286301	-0.310612
BRMS1L	0.0286534	0.354419
LOC100505498	0.0286695	-0.654555
AI953708	0.0286855	-0.788423
BE465173	0.0286881	-0.790922
BF507638	0.0287511	-0.326736
GSDMB	0.0287788	-0.858359
KCNAB1	0.0287808	0.634688
LOC101927342	0.0287951	0.931644
CCDC115	0.0288204	-0.248403
AI792880	0.0289719	-0.849973
LOC100287497	0.0290871	-0.483112
C8orf44-SGK3	0.0291276	0.273572
YBX3	0.0291324	0.713412
AP1S2	0.0291373	0.329411
ZNF503-AS1	0.0291514	-0.601622
AV649718	0.0291514	0.62409
PLEKHA3	0.0292223	0.241233
AK022191	0.0292303	-0.573839
DCAF16	0.0293108	-0.315948
OCR1	0.0293124	-1.04711
OPA3	0.0293171	-0.282249
AI034351	0.0293205	-0.918361
TFEC	0.0293361	0.618096
VPS35	0.0293369	0.290827
DDX17	0.0293489	-0.574178
RPS27A	0.0293601	-0.220806
BE156417	0.0293858	0.726429
CCDC110	0.0294079	-0.870471
NUCKS1	0.0294107	-0.357662
DIRC3	0.0295112	0.540287
MTRF1L	0.0295749	0.204565
WASL	0.0296433	0.306566
LINC01102	0.0296669	0.923984
CAND1	0.0297743	0.246813
AI435163	0.02978	-0.533377
FAM213B	0.0298676	-0.389796
LOC100506922	0.0299371	-0.591443
RELL1	0.0299658	0.300355
AK026036	0.0300096	-0.620644
CERCAM	0.0301045	-0.480186
HR	0.0301106	0.807475
AW449270	0.0301292	0.737817
SLC31A1	0.0301361	0.464526
AI652000	0.0301414	-0.512744
FRG1EP	0.0301601	-0.794743
SNRPA1	0.0302033	-0.35829
AI934364	0.0302421	-0.631246
RDH13	0.0303314	-0.198432
AI654982	0.0303402	-0.710981
EGLN2	0.0303857	0.857748
BE501878	0.0304315	0.608462
LOC101927093	0.0304426	-0.58035
AU149960	0.0305256	-0.94771
LINC01255	0.0305383	-1.13191
WNK1	0.0305908	-0.62525
PTBP1	0.0305973	-0.455552
AW594033	0.0306022	1.04117
CCDC146	0.030624	0.358406
FHDC1	0.0306407	0.369055
EPB41	0.030695	-0.305745
CRACR2B	0.0307784	0.55105
CDH8	0.0307888	-0.715441
KLHDC9	0.0307961	0.518338
ZAK	0.0309444	0.324018
OST4	0.0309625	-0.222249
MED29	0.0309826	-0.247348
TRMT1L	0.0310167	0.351383
R24061	0.0311345	0.409097
BC006216	0.0311402	0.753824
COG3	0.0311436	0.327983
BE875072	0.0312848	0.367277
CDC42EP3	0.0313016	0.364607
GALK1	0.0313408	-0.696658
STXBP5	0.0313491	0.239487
R37691	0.031404	-0.705802
HINT3	0.0314153	0.242504
AA825243	0.0314315	1.05745
AW664828	0.0314353	-0.678884
RHOF	0.0314808	-0.344194
AI873117	0.031483	0.641154
HSF5	0.0315476	0.922775
N69685	0.031569	0.743543
SLC5A1	0.0315714	-0.717876
CLN6	0.0315724	0.802339
ZKSCAN3	0.0315956	0.362849
FBRSL1	0.0316152	-0.241268
APCDD1L	0.0316228	-0.553991
TTC17	0.0317042	0.226765
ASB17	0.0317218	-0.594951
FBXO22	0.0317375	0.362005
MAML2	0.0317539	0.300134
TEX9	0.0318779	1.1308
AI142126	0.0318827	-0.662755
C16orf86	0.0319108	-0.778841
IL6R	0.0319201	0.297728
FRG1BP	0.0319296	-0.304444
AV723710	0.0319842	-0.592126
YPEL1	0.0319882	-0.30723
FBXL3	0.0320189	0.274353
DYNC1LI2	0.0320346	0.313091
PPARGC1B	0.032047	-0.321909
AI804994	0.0320476	1.02789
MED4	0.0320757	-0.38362
GRAMD1A	0.03212	-0.238731
LINC00853	0.0321645	-0.793798
TMEM256	0.0322025	-0.272937
AA721240	0.0322306	-0.413544
RFC3	0.0322879	-0.804076
MAPK1	0.0323603	0.208168
ASB8	0.0323758	-0.215567
FAM45A	0.032404	0.222889
ZNF585A	0.0324113	0.246689
CHIC1	0.0324586	0.25752
ERFE	0.0324753	0.795263
DPP8	0.0325733	0.196688
CDK12	0.032623	0.206613
UBE2G1	0.0326683	-0.204623
LOC100505530	0.0326848	-0.521285
FBXL12	0.0326872	-0.767417
CFAP221	0.0326981	-0.245644
RSAD2	0.032743	0.530014
SLC35B3	0.0327773	0.369657
HSPB9	0.0327985	-0.727572
BF448159	0.0329042	-0.49539
OSGEPL1	0.032957	0.328911
ECHDC1	0.0330709	0.368416
GTF3C4	0.0331115	0.390625
ZNF254	0.0331184	-0.250701
AK022004	0.0331703	0.382537
RALGPS2	0.0331902	0.369858
ARHGAP5-AS1	0.0332117	-0.506949
AW300500	0.03333	-1.14443
AI798769	0.0333701	0.35995
DOK6	0.0333797	0.545057
ZBTB7B	0.0333975	-0.663063
RGS18	0.0334507	0.553024
ZNF512	0.0334556	0.305925
ZNF687	0.0334601	-0.741486
LOC100506082	0.0335078	1.01096
ZNF229	0.033559	1.05705
PRDM1	0.0336388	0.329804
AA829860	0.0336837	0.536374
SSPN	0.0337074	0.819313
AA830326	0.0337703	0.909029
RNASEK-C17orf49	0.0337843	-0.246146
LARP4	0.033799	0.468487
BEX2	0.0338455	-0.384579
GREM2	0.0338923	-0.682109
AK024577	0.0339569	-0.692714
FGD4	0.0339655	0.4105
PHKG1	0.0340793	-0.932783
CEP104	0.0341599	-1.09611
TNFSF14	0.03419	0.289225
TSPAN2	0.0342004	0.406409
ZNF471	0.034217	0.666416
TRDN	0.0342343	1.07945
AI732263	0.0342581	-0.741955
AI565054	0.0342637	0.681649
ARRDC1	0.0343228	-0.318587
DOCK7	0.0343329	0.267791
GPR161	0.0343632	0.33417
SLFNL1-AS1	0.0343689	-0.635739
SAMD12	0.0343928	-0.644934
AV649304	0.034408	0.542259
PTAR1	0.0345417	0.230273
ORAI2	0.0345685	-0.281538
AI701036	0.0345799	-0.762925
KIF2B	0.0346007	0.911605
AI523245	0.0348196	0.447001
BE467740	0.0349279	-0.605708
MMAA	0.0349505	0.307829
ZWILCH	0.0349513	0.284121
COLCA2	0.0350055	0.826765
PLPP5	0.0350189	0.338964
BCL2L11	0.0350459	0.206464
UBAP1L	0.035071	-0.477937
AU145618	0.0350833	0.947542
STAC2	0.0350883	0.541915
LENG1	0.0351057	-0.677904
SLC2A5	0.0351422	-0.330189
DUS3L	0.035157	-0.315024
FBXW7	0.0351684	-0.216042
HIST1H3E	0.0352221	0.819679
AI264003	0.0352461	0.302121
LINC00334	0.0354293	-0.394964
HELQ	0.035445	0.340068
LINC00836	0.0354994	0.754058
AI198212	0.0355039	0.588467
NR2F1-AS1	0.0355393	-0.689278
TFG	0.0355794	0.358608
BTF3	0.0356168	-0.832723
PPM1A	0.0356903	0.224977
MESP1	0.0357097	-0.498345
USMG5	0.0357169	0.187691
AI821449	0.0357498	-0.93936
FAM131C	0.035856	-0.61534
CNPPD1	0.0358858	-0.226986
ZNF385A	0.0359054	-0.394378
NYAP2	0.0359114	0.751458
NAV1	0.0359706	0.249631
HNMT	0.0359901	0.450236
ERF	0.0360188	-0.788058
PIK3C3	0.0360392	0.245405
TNFSF13B	0.0360831	0.362226
CSTB	0.0361507	-0.667089
BORCS6	0.0363781	-0.796263
SLC38A10	0.0364215	-0.353853
ZNF70	0.0364711	0.280028
CGN	0.0364783	0.628253
PATJ	0.0365045	-0.307255
LOC101930400	0.0365267	0.635501
TMEM174	0.0365949	0.280732
FLYWCH1	0.0366059	-0.44646
SLC25A25	0.0366068	0.410206
ZBED6CL	0.0366562	-0.311558
AW511032	0.0366682	0.834319
BC005095	0.036706	-0.60596
AA827728	0.0367959	-0.348755
TAL2	0.0367976	-0.381306
FAM69B	0.0367977	-0.379448
CPSF3	0.0368076	0.223725
ETS1	0.0368437	-0.300029
AI287817	0.0368485	0.408118
TAS2R5	0.0369035	0.784745
CARNMT1	0.0369648	-0.499077
LOC100129449	0.0369846	-0.785478
PANX1	0.0369992	0.295844
ACAA2	0.037003	0.783121
AA932539	0.0370512	-0.696487
LOC90834	0.0370573	-0.414283
MAL2	0.0370614	0.913276
ETNK1	0.0370629	0.32486
SHB	0.0371292	0.812339
AW205877	0.0371811	-0.59001
PRELP	0.0371835	0.448436
BE672140	0.0372034	0.781042
PTCH1	0.037225	0.400823
GPR158	0.0372499	0.6206
AI627532	0.0372611	-0.471332
LOC100499489	0.0373662	-0.465773
RHOH	0.0374019	-0.396979
ANAPC11	0.0374764	0.246411
BF511763	0.0375206	0.323548
W96140	0.0375592	0.820247
AHCTF1	0.0375751	0.293273
AL137309	0.037579	0.694783
METAP2	0.0375867	0.310905
FDFT1	0.0376519	-0.404506
AK5	0.0376622	-0.428328
SLC1A2	0.0376984	0.98574
ATG4C	0.0377126	0.875727
DEFB103A	0.0377491	-0.843779
CELF4	0.0377615	0.339292
AI631029	0.0377773	1.10748
EHMT1	0.0377797	-0.25663
WASH1	0.0377907	-0.267245
VPS37D	0.0378451	0.799889
YJEFN3	0.0378637	-0.814173
BCAR1	0.0378678	-0.375189
IKZF1	0.0379504	0.254424
KCTD16	0.038005	0.647998
AI791828	0.0380104	-0.391414
RAD23B	0.038035	-0.289124
IL1RAPL1	0.0380767	0.797757
WBSCR22	0.0381109	-0.434578
TRA2A	0.038113	-0.376316
ABHD18	0.0381147	0.198841
AI792511	0.0381196	-0.807706
ATE1	0.038136	0.249728
PMS2P5	0.0381387	-0.239976
AI341227	0.0382425	0.692825
EIF4E3	0.0382486	0.249019
LOC286272	0.0382793	0.47235
TRIM7	0.0382817	-0.499013
MGC27345	0.0383157	0.237547
NOSTRIN	0.038325	0.900316
LOC388780	0.0383399	-0.562073
LINC00908	0.0384127	-0.920444
BF508208	0.0384801	0.795496
CHID1	0.0384887	-0.317205
AI690169	0.0385123	-0.308215
ESPNP	0.0385296	-0.609309
PLPPR5	0.0385873	-0.784932
COMMD10	0.0385933	0.372738
CC2D2A	0.0386534	-0.344437
LOC101929796	0.0386688	0.362876
AW958449	0.038708	0.719095
LOC388942	0.0387252	-0.462993
DHRS4-AS1	0.0387942	-0.324873
HPDL	0.0388314	0.995718
NOVA1	0.0388415	1.15126
ADARB2	0.0388652	-0.618177
AW592246	0.0389009	1.2462
ZNF649-AS1	0.0389822	0.580238
LINC01314	0.0389859	0.54412
ZSCAN21	0.0390407	0.345788
MIR1304	0.0391054	0.28762
IL31RA	0.0392506	0.634209
GNA13	0.0392568	0.210336
UFSP1	0.0392602	0.621172
ZNF700	0.039335	0.31908
AA682425	0.0393816	-0.694548
MFSD12	0.0393994	-0.364092
KRT80	0.0394401	0.803417
NPM1	0.0394616	-0.205142
ADAMTS1	0.0394631	0.549304
RNF145	0.0394948	0.292494
SNX3	0.0395184	0.205915
TRIM52-AS1	0.0395224	-0.646866
KLHL5	0.0395392	0.21471
NAPRT	0.0395421	-0.520279
AU144676	0.0395469	0.834974
SNORD50B	0.0396073	-0.586616
AA699809	0.039626	1.01049
VIPAS39	0.0396881	0.49146
NDUFS7	0.039717	0.64621
GPAM	0.0397881	0.307149
CUL7	0.0398202	-0.536038
AF274942	0.039826	0.897834
LINC00917	0.039865	-0.935013
BMPR1A	0.039897	0.345782
BF508786	0.0399013	0.497188
AKR1E2	0.0399072	-0.595979
CHURC1	0.0399105	0.348726
AU147828	0.0399764	-0.600295
FOXN2	0.0399957	0.310584
BE549644	0.0400631	-1.02448
ABHD12	0.0400721	-0.307363
AI371550	0.0402071	-1.43106
LOC100996809	0.0402284	-1.90396
LINC01590	0.0402487	0.808438
BIRC6	0.0402505	0.194783
FOXS1	0.0403286	-0.687818
PROSER3	0.0403308	-0.290249
ZNF146	0.0403457	0.263713
AI761812	0.0403482	0.868651
DUSP15	0.040356	-0.518285
RASAL3	0.0403839	-0.405194
STYX	0.0403845	-0.36519
LOC100507652	0.040397	0.748407
STRADB	0.0404208	0.395791
TMEM165	0.0404484	0.305318
C2orf68	0.040569	-0.206316
C2orf70	0.0405984	0.619554
ASNS	0.0406584	-0.749628
ZNF581	0.040708	-0.276917
IDI1	0.0407211	-0.313547
AI658485	0.0407253	0.749592
MLKL	0.0407379	0.290177
GOLGA6D	0.040822	-0.536895
PPP2CA	0.0408751	-0.270299
T86276	0.0409476	0.628867
AA699656	0.0410425	-0.429333
OPTC	0.0410603	-0.292137
AI655229	0.0411132	-0.836465
AW300612	0.0411478	-0.515928
MAF1	0.0411774	-0.340028
ELAVL4	0.0411882	-0.547959
PPP6C	0.0412802	0.201645
LNPK	0.0413004	0.247728
AW003011	0.041394	0.843191
CDC42	0.0414113	-0.429666
P2RX2	0.0416077	-0.542333
FLJ12120	0.0416278	0.763803
TRIM25	0.0416516	0.239504
AV649666	0.0417115	-0.888456
DYNC1I2	0.0417259	0.520219
TP73	0.0418753	-0.595885
RNASEH2C	0.0418846	0.211732
LRFN4	0.041954	-0.218309
ZNF219	0.0420044	0.381784
SLC36A4	0.0420166	0.306037
AW966903	0.0420891	-0.355775
AV694053	0.0421415	-0.695543
DAB1	0.0423138	-0.63899
AF333762	0.0423274	0.660791
CYSLTR1	0.0423854	0.34005
FAM213A	0.0423921	-0.212388
TUBGCP4	0.0424517	0.626104
DDX5	0.0425041	-0.378361
SLC30A4	0.0425152	0.307607
UBE2T	0.0425262	0.758335
AK022040	0.0425339	-0.660944
KIAA1143	0.0425597	-0.244211
UHRF1BP1	0.0425902	0.266628
NPW	0.0426789	-0.283689
LINC00982	0.0427764	-0.335877
KIAA0232	0.0427877	0.292614
FAR2	0.0428674	0.646564
G2E3	0.042914	0.208778
AW591282	0.0429321	-0.740773
AI241540	0.0429676	0.785659
CFL2	0.0429967	-0.308495
AI923687	0.0429968	-0.920807
APPL1	0.0430622	0.284909
MLLT6	0.0430903	-0.24911
LOC101927603	0.0431373	0.578466
R77414	0.0431909	-0.866826
C7orf50	0.0432283	-0.248764
ZNF806	0.0432553	0.335238
TRMT6	0.0432893	0.290399
THRB	0.0433164	0.788534
ANKRD9	0.0433593	-0.524991
LOC101926892	0.0433755	-0.679198
AA837131	0.0433776	-1.23297
RABL3	0.0433844	0.235967
BCL11A	0.0434533	0.360814
LOC102723722	0.0435287	-0.534388
ATP1B4	0.0436388	0.93964
MGC40069	0.0437615	0.744607
LINC01187	0.04377	-0.38805
BG290999	0.0438261	-0.469208
PARP9	0.0438268	0.286998
N23258	0.0438913	-0.858356
BF433103	0.0439233	-0.30291
AA551756	0.0439469	-0.26305
TRERF1	0.0441257	0.25895
CEP120	0.0442087	0.269487
LINC00116	0.0442218	-0.265684
FFAR4	0.0442404	0.788713
BE550429	0.0442964	-0.284235
TUBE1	0.0444219	0.309426
FOXC2	0.0444402	-0.541774
AI215629	0.0444436	-0.443097
SIAH1	0.0445188	-0.460495
RC3H1	0.044541	0.185139
RTN4IP1	0.0445645	0.689749
KRT25	0.0445993	-0.71479
LRRC4C	0.0446065	-0.582199
AL359567	0.0446194	-0.361219
CLEC3A	0.0446488	-0.66077
AW960454	0.0446664	-0.918591
AW850611	0.0446871	-0.544165
BF064257	0.044742	-0.74185
FAM193B	0.0447629	-0.553012
CELF6	0.0447674	-0.276974
TMEM31	0.0448028	0.829088
RNASEL	0.0448582	0.456377
AW182960	0.0448607	0.806509
LIN7A	0.0448663	0.470138
RFESD	0.0448776	0.404202
LINC00662	0.0449026	0.322685
HOXA11-AS	0.0449109	-0.59447
TCAIM	0.0449116	0.303485
SON	0.0450829	0.285742
LOC100128198	0.0451268	-0.868391
AU151465	0.0451548	-0.841948
C15orf48	0.0451626	1.0808
ZNF627	0.045163	0.261498
AI018790	0.0452666	-0.721268
SDCCAG3	0.0452837	-0.358445
ZNF383	0.0455355	0.489084
FAM200B	0.0456615	-0.203756
NPL	0.0456621	0.342022
TMEM259	0.0456676	-0.309392
MRPL2	0.0456699	-0.271763
AI630997	0.0456878	-0.348704
AGAP9	0.0457018	-0.519035
TMEM139	0.0457404	0.568932
ADAD1	0.0458381	-0.27367
STK11	0.0458578	-0.512795
LINC00623	0.0459019	-0.238143
LTB4R	0.0459441	0.274929
AI884677	0.0459728	0.842524
ATP8B3	0.045982	0.829365
AI400209	0.0459989	0.409467
PRICKLE1	0.0460015	0.331661
GCNT1	0.0460043	0.364329
ANKRD13C	0.0460099	0.227739
AI251870	0.0460191	-0.485902
AI540253	0.0460441	-0.370064
LOC101930097	0.0461494	-0.359618
EXD2	0.0462397	0.296011
LRR1	0.0463772	0.255487
AADACL2	0.0464442	0.943045
GALNT1	0.0465288	0.561984
MAGT1	0.0465622	-0.218178
FSD1L	0.0465683	0.255121
BF223214	0.0465949	-1.03094
MRPL30	0.0466033	-0.178096
TBC1D1	0.0466109	0.356556
DCAF1	0.0466527	0.301789
OGFRL1	0.0466961	0.309813
AW502656	0.0466964	-0.402174
CHCHD5	0.0467102	-0.294194
KCNJ10	0.0468751	-0.507647
BE220569	0.0468985	-0.570952
AI269471	0.0469177	0.721113
GALK2	0.0469403	0.438886
PAQR8	0.0469823	0.375396
C21orf91	0.0469838	0.317966
AA921841	0.0469863	-0.272631
ERICH1	0.046996	0.219661
ARIH2	0.0470097	-0.26329
LOC101930006	0.0470211	0.713092
SLC38A7	0.0470321	-0.4
AU146874	0.0470529	1.09316
BF439270	0.047127	-0.515615
SPTBN1	0.0471673	-0.318996
RPS14	0.0472192	0.82407
GIGYF1	0.0472232	-0.285273
PAQR7	0.047224	-0.327769
OLFM2	0.0473395	-0.578766
AI167682	0.0473819	0.720204
CREBRF	0.0473945	0.188852
TOR1AIP2	0.0473974	0.214027
YARS	0.0474474	-0.364932
SYCP2	0.0474852	-1.103
CORO1C	0.0474987	-0.354152
ITGB4	0.0477545	-0.714837
PRR14L	0.0477861	0.362064
M97943	0.0478383	-0.369678
NPC1	0.0478611	-0.511816
SLC24A4	0.0479384	0.650997
R20529	0.0479493	0.917143
POLDIP2	0.0479559	-0.596639
FAM53B-AS1	0.0479606	0.422933
D59759	0.0480018	1.2101
JARID2	0.048021	-0.706048
FBXO44	0.0480957	-0.245081
LOC100506675	0.0482109	0.624911
RIOK2	0.0482692	0.32265
AI308174	0.0483182	0.455932
NACC1	0.0484132	-0.210638
GLIPR1L1	0.0484464	-0.356728
LOC642980	0.0485323	0.797754
AI821782	0.0485375	-0.918055
PACSIN2	0.0486027	0.740557
ZNF596	0.0486401	0.715077
TXNDC15	0.0486505	0.314862
TMEM132E	0.0486528	-0.651874
DNAJC15	0.0486894	0.246214
GPRC5C	0.0487097	0.744941
BG111808	0.0487216	-0.346781
CR2	0.0487317	0.900253
PCDHB9	0.0487981	0.638099
FAHD2A	0.0488586	-0.34456
BCAP29	0.04888	0.202614
SLC5A10	0.0490424	-0.696604
GATAD2B	0.0490493	-0.285946
RAPGEF6	0.0490763	0.287671
GPATCH11	0.0492161	0.20255
AA088388	0.049251	0.27598
POU2F2	0.0492887	0.219559
ZNF598	0.0492972	-0.611444
PLA2G12B	0.049308	-0.417178
ERVK3-1	0.0495093	0.337909
UBR4	0.0495344	0.423608
NDUFC2-KCTD14	0.04956	-0.239551
JMJD4	0.0495657	0.367902
ZNF280B	0.0495786	0.315814
MKKS	0.0496228	0.288978
AW340015	0.0496362	-1.03292
LOC100505501	0.0496516	-0.501677
AP1S3	0.0496766	0.903721
AI972661	0.0496924	0.345326
AK026893	0.0497044	0.469167
FAM223B	0.0497624	-0.306685
FZD3	0.049804	0.275995
MGME1	0.0498283	0.282184
FAM118A	0.0498347	-0.553839
BE670600	0.0498394	0.254881
SLC6A18	0.0498497	-0.68459
AI341837	0.0499006	-0.709766
BC005072	0.0499438	-0.245523
AI701798	0.0499628	-0.796613
