# Supplementary material for: Comparative Analysis of the Transcriptome of Latent Autoimmune Diabetes in Adult (LADA) Patients from Eastern China
Source: J Diabetes Res. 2019 Dec 14;2019:8616373. doi: 10.1155/2019/8616373 (PMC6948325; doi:10.1155/2019/8616373)
Supplement: Supplementary 7 — Table S7: LADA patient information. [file 8616373.f7.xlsx]

## Sheet: Sheet1
Patient number	Categry	Gender	Age	BMI	HbA1c	Anti-glutamic acid decarboxylase antibody (GADA)	Time of using insulin	Insulin level （fasting)
1	LADA	Female	56	24.38	0.09	Yes	10 years	14.62 uIU/ml
2	LADA	Female	62	28	0.077	Yes	2 years	19.26 uIU/ml
3	LADA	Female	64	24	0.113	Yes	0 year	14.96 uIU/ml
4	LADA	Male	63	24.3	0.097	Yes	0 year	21.34 uIU/ml
5	Healthy	Male	52	24.4	0.043	No	0 day	7.09 uIU/ml
6	Healthy	Male	43	21.7	0.048	No	0 day	7.01 uIU/ml
7	Healthy	Female	29	23.4	0.047	No	0 day	6.88 uIU/ml
8	Healthy	Male	29	23.1	0.052	No	0 day	7.22 uIU/ml
9	Healthy	Female	34	21.5	0.051	No	0 day	6.6 uIU/ml
