# Supplementary material for: Comparative Analysis of the Transcriptome of Latent Autoimmune Diabetes in Adult (LADA) Patients from Eastern China
Source: J Diabetes Res. 2019 Dec 14;2019:8616373. doi: 10.1155/2019/8616373 (PMC6948325; doi:10.1155/2019/8616373)
Supplement: Supplementary 8 — Table S8: subgroup analysis of the upregulated DEGs between LADA and healthy patients based on insulin treatment or not. [file 8616373.f8.xlsx]

## Sheet: Sheet1
Upregulated genes between LADA group and Control group,identified in Table 1
Note: LADA patients 1 and 2 used Insulin more than 2 years while LADA patients 3 and 4 has not used insulin before the diaglosis.
gene_id	Changed direction (LADA group vs Control group)	Log2(LADA1/2 - LADA3/4)
SPATA6L	Up	3.12586
HSD11B1	Up	3.08178
PRSS41	Up	3.06403
LOC105370295	Up	2.89392
ANXA8	Up	1.82586
TMEM232	Up	1.82188
FAM221B	Up	1.62417
HEPACAM2	Up	1.56996
RGPD2	Up	1.43285
EDA	Up	1.35278
SLC28A3	Up	1.2518
LOC105376752	Up	1.23073
ACKR1	Up	1.19231
DACT1	Up	1.11516
SORCS3	Up	1.11266
SUPT3H	Up	1.10943
RAP1GAP	Up	1.10308
FZD6	Up	1.10168
KRT18	Up	1.09045
LOC105369155	Up	1.06533
ACHE	Up	0.999944
ALAS2	Up	0.98637
TMEM38A	Up	0.927862
IFI27	Up	0.919946
CA1	Up	0.90348
TCEA3	Up	0.903082
SLC5A5	Up	0.882442
RGMB	Up	0.864574
HKDC1	Up	0.855263
TRIM58	Up	0.851089
CDH4	Up	0.8353
OVOS2	Up	0.818789
NKX3-1	Up	0.799845
PTCRA	Up	0.79648
PNMA3	Up	0.794722
C16orf95	Up	0.792307
OLR1	Up	0.791704
BCAM	Up	0.761765
KRT73	Up	0.74181
UPK3A	Up	0.739342
EMID1	Up	0.736673
KANK2	Up	0.731358
SELENBP1	Up	0.725305
TSPAN7	Up	0.723511
GMPR	Up	0.692748
CTSE	Up	0.680131
CACNA1I	Up	0.669716
TSTA3	Up	0.662601
SLC4A1	Up	0.661472
CCL23	Up	0.643566
MUC8	Up	0.628223
SLC38A5	Up	0.627371
ADAMTS2	Up	0.612987
LOC107984138	Up	0.601551
RETN	Up	0.59065
CPNE7	Up	0.561471
KRT1	Up	0.558984
SLC22A13	Up	0.531215
SPDYC	Up	0.508958
EPB42	Up	0.501341
KLF1	Up	0.495021
MB21D2	Up	0.485411
GYPA	Up	0.481934
TMOD1	Up	0.47339
MMP8	Up	0.471467
C9orf78	Up	0.46466
IL23A	Up	0.445851
SMIM5	Up	0.436263
OSBP2	Up	0.431496
SLC14A1	Up	0.425052
FHIT	Up	0.4134
XK	Up	0.410529
NPC1L1	Up	0.408663
YBX3	Up	0.400575
ACVRL1	Up	0.395446
CHPT1	Up	0.394551
GPR146	Up	0.394186
CDS1	Up	0.383758
DNLZ	Up	0.376615
SPR	Up	0.374851
SMOX	Up	0.371683
TSHZ2	Up	0.371118
CCL2	Up	0.361769
ARC	Up	0.355693
PID1	Up	0.345199
GLRX5	Up	0.332475
OLFM1	Up	0.3303
ST6GALNAC4	Up	0.327109
KLKB1	Up	0.326784
FKBP1B	Up	0.323683
LOC107985770	Up	0.321256
IGF2BP2	Up	0.314785
NRP1	Up	0.31107
GSTM3	Up	0.307226
MYL4	Up	0.291639
PRKCDBP	Up	0.285635
TSPAN4	Up	0.278276
PPBP	Up	0.272956
PTPRN	Up	0.2712
ZP3	Up	0.263856
EGFL7	Up	0.25854
TREML1	Up	0.251696
FAM132B	Up	0.245363
FAM210B	Up	0.234581
PCDH12	Up	0.227298
HBD	Up	0.21481
HRASLS	Up	0.211566
SLC25A39	Up	0.210338
MARCO	Up	0.203745
PADI6	Up	0.200217
PF4	Up	0.195397
ANKRD9	Up	0.188897
MFSD2B	Up	0.174355
TUBB2A	Up	0.173706
CLDN7	Up	0.172521
KLC3	Up	0.167715
PI16	Up	0.163802
SMIM1	Up	0.151382
FAXDC2	Up	0.134743
PLEK2	Up	0.10846
SLC6A3	Up	0.105711
SAMD14	Up	0.103015
AHSP	Up	0.0900225
HMBS	Up	0.0863381
TPPP3	Up	0.0843438
CLDN5	Up	0.0818704
CMTM5	Up	0.0594649
ASGR1	Up	0.0495519
L1TD1	Up	0.0411738
ZNF385C	Up	0.0360385
PCSK1N	Up	0.0345541
METTL21B	Up	0.0242001
EMP1	Up	0.0206597
SEMA3G	Up	0.0177643
LDHC	Up	0.0175386
TTC25	Up	0.0169387
HES6	Up	0.00920403
KEL	Up	0.00629372
LGALS3	Up	0.00434036
HBQ1	Up	-0.0155654
NT5DC2	Up	-0.0192489
KLHDC8A	Up	-0.0305311
SLC9A5	Up	-0.0366787
ACP5	Up	-0.0368731
A1BG	Up	-0.0435349
RUNDC3A	Up	-0.0526808
BLVRB	Up	-0.0581443
SH3RF3	Up	-0.0694518
BBOF1	Up	-0.0714733
LOC107984832	Up	-0.0837132
PF4V1	Up	-0.0879915
SGIP1	Up	-0.0928807
FAM86C1	Up	-0.101925
TMEM63C	Up	-0.105074
RPP25	Up	-0.112358
KANK1	Up	-0.120601
TJP3	Up	-0.141337
SHROOM1	Up	-0.154409
FAM69B	Up	-0.159974
NR2F6	Up	-0.174686
C20orf27	Up	-0.175871
DPM2	Up	-0.178106
RHD	Up	-0.184639
TRNP1	Up	-0.195356
AQP10	Up	-0.209431
THEM5	Up	-0.21326
DES	Up	-0.238799
ARG2	Up	-0.248596
CXCL8	Up	-0.261271
LY6G6F	Up	-0.269915
TUBB6	Up	-0.296923
DPCD	Up	-0.307455
ICAM4	Up	-0.309567
CPT1C	Up	-0.324418
NKPD1	Up	-0.328054
ENHO	Up	-0.335915
PVALB	Up	-0.357151
KNDC1	Up	-0.35764
CAMP	Up	-0.365885
TSPO2	Up	-0.387084
KCNK17	Up	-0.434512
CCNE1	Up	-0.435961
RNASE1	Up	-0.443528
NMNAT3	Up	-0.459373
RNASE3	Up	-0.521535
PGF	Up	-0.61203
KCNH3	Up	-1.05996
APOE	Up	-1.10168
TMC5	Up	-1.17804
HBA1	Up	-1.19534
SLC4A11	Up	-1.27684
KLHL30	Up	-1.35941
SMIM11A	Up	-1.52116
FAM167B	Up	-1.69597
MAPK12	Up	-1.76409
LOC107984159	Up	-1.89603
CAPN11	Up	-4.34843
