# Supplementary material for: Comparative Analysis of the Transcriptome of Latent Autoimmune Diabetes in Adult (LADA) Patients from Eastern China
Source: J Diabetes Res. 2019 Dec 14;2019:8616373. doi: 10.1155/2019/8616373 (PMC6948325; doi:10.1155/2019/8616373)
Supplement: Supplementary 9 — Table S9: subgroup analysis of the downregulated DEGs between LADA and healthy patients based on insulin treatment or not. [file 8616373.f9.xlsx]

## Sheet: Sheet1
Down-regulated genes between LADA group and Control group,identified in Table 1
Note: LADA patients 1 and 2 used Insulin more than 2 years while LADA patients 3 and 4 has not used insulin before the diaglosis.
gene_id	Changed direction (LADA group vs Control group)	Log2(LADA1/2 - LADA3/4)
PARVA	Down	-2.50136
NOMO3	Down	-1.78753
PTPRK	Down	-1.45347
HLA-DQA1	Down	-1.38747
EFNA5	Down	-1.38221
LOC107985544	Down	-0.9593
BAALC	Down	-0.940594
C17orf97	Down	-0.765365
PCDH1	Down	-0.7534
TMEM191B	Down	-0.725506
SUSD2	Down	-0.693145
LGALS9C	Down	-0.601499
GAS1	Down	-0.445874
ERAP2	Down	-0.422197
LOC107987158	Down	-0.319637
TIAM2	Down	-0.158692
AGAP1	Down	-0.141598
DRICH1	Down	-0.126736
MYRF	Down	-0.0866347
VLDLR	Down	-0.0845539
TCF4	Down	-0.0430157
TENM1	Down	-0.0312047
AFAP1	Down	-0.00281222
TGFBR3	Down	0.0422693
PRF1	Down	0.056746
UBR1	Down	0.08837
ZBTB16	Down	0.098375
FBLN2	Down	0.11273
SERPINE2	Down	0.124416
AP1S3	Down	0.141532
CDCP1	Down	0.161429
RGPD5	Down	0.163752
ITPR2	Down	0.18668
DLG5	Down	0.228233
BNC2	Down	0.234361
EIF1AY	Down	0.23901
DICER1	Down	0.24299
CHD7	Down	0.275341
S100B	Down	0.279885
FEZ1	Down	0.313106
NCAM1	Down	0.315733
DNAH10	Down	0.323551
NTRK1	Down	0.329072
LY75	Down	0.345103
RAPGEF2	Down	0.366309
JMJD1C	Down	0.374447
RAB38	Down	0.404246
IGF2R	Down	0.406522
U2AF1L5	Down	0.41565
PTPRM	Down	0.417536
EPB41L4A	Down	0.429643
SPTY2D1	Down	0.472333
HK2	Down	0.508684
UTRN	Down	0.572918
PALLD	Down	0.579204
BOD1L1	Down	0.579254
TCAF1	Down	0.594052
PODXL	Down	0.793294
AMOT	Down	0.847232
NEO1	Down	0.889996
NINL	Down	1.00857
ZNF501	Down	1.02539
CCND1	Down	1.21015
LIMS4	Down	1.30383
HOMER1	Down	1.31721
USP9Y	Down	1.49957
DDX3Y	Down	1.6198
ZFY	Down	1.92289
IRF6	Down	2.08462
